1 **Title:**

2 Slo2 potassium channel function depends on a SCYL1 protein

3 **Authors:**

4 Long-Gang Niu, Ping Liu, Zhao-Wen Wang, Bojun Chen\*

5 **Author Affiliation:**

6 Department of Neuroscience, University of Connecticut Health Center, Farmington, CT 06032, USA

7 **\*Corresponding Author:**

8 Bojun Chen, Ph.D.

9 Department of Neuroscience

10 University of Connecticut Health Center

11 263 Farmington Avenue

12 Farmington, CT 06032

13 Email: [bochen@uchc.edu](mailto:bochen@uchc.edu)

14 **Abstract**

15 Slo2 potassium channels play important roles in neuronal function, and their mutations in humans cause  
16 epilepsies and cognitive defects. However, little is known how Slo2 function is regulated by other proteins.  
17 Here we found that the function of *C. elegans* Slo2 (SLO-2) depends on *adr-1*, a gene important to RNA  
18 editing. However, *slo-2* transcripts have no detectable RNA editing events and exhibit similar expression  
19 levels in wild type and *adr-1* mutants. In contrast, mRNA level of *scyl-1*, which encodes an orthologue of  
20 mammalian SCYL1, is greatly reduced in *adr-1* mutants due to deficient RNA editing at a single adenosine  
21 in its 3'-UTR. SCYL-1 physically interacts with SLO-2 in neurons. Single-channel open probability of  
22 SLO-2 in neurons is reduced by ~50% in *scyl-1* knockout whereas that of human Slo2.2/Slack is doubled  
23 by SCYL1 in a heterologous expression system. These results suggest that SCYL-1/SCYL1 is an  
24 evolutionarily conserved regulator of Slo2 channels.

## 25 **Introduction**

26 Slo2 channels are large-conductance potassium channels existing in mammals as well as invertebrates  
27 (Kaczmarek, 2013; Yuan et al., 2000). They are the primary conductor of delayed outward currents in many  
28 neurons examined (Budelli et al., 2009; Liu et al., 2014). Human and mouse each has two Slo2 channels  
29 (Slo2.1/Slick and Slo2.2/Slack) (Kaczmarek, 2013), whereas the nematode *C. elegans* has only one (SLO-  
30 2). These channels are abundantly expressed in the nervous system (Bhattacharjee et al., 2002;  
31 Bhattacharjee et al., 2005; Joiner et al., 1998; Liu et al., 2018; Rizzi et al., 2016), and play major roles in  
32 shaping neuronal electrical properties and regulating neurotransmitter release (Kaczmarek, 2013; Liu et al.,  
33 2014). Mutations of Slo2 channels cause epilepsies and severe intellectual disabilities in humans  
34 (Ambrosino et al., 2018; Cataldi et al., 2019; Evely et al., 2017; Gururaj et al., 2017; Hansen et al., 2017;  
35 Kawasaki et al., 2017; Lim et al., 2016; McTague et al., 2018; Rizzo et al., 2016), and reduced tolerance to  
36 hypoxic environment in worms (Yuan et al., 2003). Emerging evidence suggests that physiological  
37 functions of these channels depend on other proteins. For example, in mice, the fragile mental retardation  
38 protein (FMRP), a RNA binding protein, enhances Slack activity by binding to its carboxyl terminus  
39 (Brown et al., 2010). In worms, HRP-2, a RNA/DNA binding protein, controls the expression level of  
40 SLO-2 through a posttranscriptional effect (Liu et al., 2018).

41 RNA editing is an evolutionally conserved post-transcriptional process catalyzed by ADARs (*adenosine*  
42 *deaminases acting on RNA*) (Gott and Emeson, 2000; Jin et al., 2009). ADARs convert adenosine (A) to  
43 inosine (I) in double-stranded RNA. Since inosine is interpreted as guanosine (G) by cellular machineries  
44 (Basilio et al., 1962), A-to-I RNA editing may alter the function of a protein by changing its coding potential,  
45 or regulate gene expression through altering alternative splicing, microRNA processing, or RNA  
46 interference (Deffit and Hundley, 2016; Nishikura, 2016). Human and mouse each has three ADARs:  
47 ADAR1, ADAR2 and ADAR3 (Chen et al., 2000; Kim et al., 1994; Melcher et al., 1996). ADAR1 and  
48 ADAR2 possess deaminase activity and catalyzes the A-to-I conversion (Tan et al., 2017), whereas ADAR3  
49 is catalytically inactive with regulatory roles in RNA editing (Nishikura, 2016) Millions of A-to-I editing

50 sites have been detected in the human transcriptome through RNA-seq, with the vast majority of them found  
51 in non-coding regions (Nishikura, 2016). Biological effects of RNA editing at coding regions have been  
52 revealed for a variety of genes, including those encoding ligand- and voltage-gated ion channels and G  
53 protein-coupled receptors (Bhalla et al., 2004; Brusa et al., 1995; Burns et al., 1997; Gonzalez et al., 2011;  
54 Huang et al., 2012; Lomeli et al., 1994; Palladino et al., 2000; Rula et al., 2008; Sommer et al., 1991; Streit  
55 et al., 2011). However, little is known about the roles of RNA editing in non-coding regions (Nishikura,  
56 2016).

57 In a genetic screen for suppressors of a sluggish phenotype caused by expressing a hyperactive SLO-2  
58 in worms, we isolated mutants of several genes, including *adr-1*, which encodes one of two ADARs in *C.*  
59 *elegans* (ADR-1 and ADR-2). While ADR-2 has deaminase activity and plays an indispensable role in the  
60 A-to-I conversion, ADR-1 is catalytically inactive but can regulate RNA editing by binding to selected  
61 target mRNA and altering the accessibility of specific adenosines to ADR-2 (Ganem et al., 2019; Rajendren  
62 et al., 2018; Washburn et al., 2014). We found that loss-of-function (*lf*) mutations of *adr-1* impairs SLO-2  
63 function through altering RNA editing of *scyl-1*, which encodes an orthologue of human and mouse SCYL1.  
64 In *adr-1(lf)* mutants, a lack of A-to-I conversion at a specific site in *scyl-1* 3'-UTR causes reduced *scyl-1*  
65 expression. Knockout of *scyl-1* severely reduces SLO-2 current in worms while coexpression of SCYL1  
66 with human Slack in *Xenopus* oocytes greatly augments channel activity. These results suggest that SCYL-  
67 1/SCYL1 likely plays an evolutionarily conserved role in physiological functions of Slo2 channels.  
68 Mutations or knockout mammalian SCYL1 may cause neural degeneration, intellectual disabilities, and  
69 liver failure, but the underlying mechanisms are unclear (Lenz et al., 2018; Li et al., 2019; Shohet et al.,  
70 2019; Spagnoli et al., 2018, 2019). The revelation of SCYL-1/SCYL1 as a protein important to Slo2  
71 channels suggests a potential link between diseases caused by SCLY1 mutations and Slo2 channel functions.

72

## 73 **Results**

74 *adr-1* mutants suppress sluggish phenotype of *slo-2(gf)*

75 In a genetic screen for mutants that suppressed a sluggish phenotype caused by an engineered hyperactive  
76 or gain-of-function (*gf*) SLO-2 (Liu et al., 2018), we isolated two mutants (*zw80* and *zw81*) of the *adr-1*  
77 gene, as revealed by analyses of whole-genome sequencing data. *zw80* and *zw81* carry nonsense mutations  
78 leading to premature stops at tryptophan (W) 366 and W33, respectively (**Fig. 1A**). *slo-2(gf)* worms showed  
79 greatly decreased locomotion speed compared with wild type, and this phenotype was substantially  
80 alleviated in *slo-2(gf);adr-1(lf)* double mutants (**Fig. 1B**). To confirm that the suppression of *slo-2(gf)*  
81 phenotype resulted from mutations of *adr-1* rather than that of another gene, we created a new *adr-1* mutant  
82 allele (*zw96*) by introducing a premature stop codon at serine (S) 333 (**Fig. 1A**) using the CRISPR/Cas9  
83 approach. The sluggish phenotype of *slo-2(gf)* was similarly suppressed by *adr-1(zw96)*, which, by itself,  
84 did not enhance locomotion speed (**Fig. 1B**). Expression of wild-type *adr-1* under the control of the pan-  
85 neuronal *rab-3* promoter (*Prab-3*) in *slo-2(gf);adr-1(zw96)* reinstated the sluggish phenotype (**Fig. 1B**).  
86 These results indicate that the sluggish phenotype of *slo-2(gf)* is mainly caused by SLO-2 hyperactivity in  
87 neurons, and that neuronal function of SLO-2(*gf*) depends on ADR-1.

88 In *C. elegans*, cholinergic motor neurons control body-wall muscle cells by producing bursts of  
89 postsynaptic currents (PSC bursts) (Liu et al., 2014). To determine how *adr-1* mutants might alleviate the  
90 *slo-2(gf)* locomotion defect, we recorded voltage-activated whole-cell currents from a representative  
91 cholinergic motor neuron (VA5) and postsynaptic currents from body-wall muscle cells in wild type, *slo-*  
92 *2(gf)*, *slo-2(gf);adr-1(zw96)*, and *slo-2(gf);adr-1(zw96)* with *adr-1* rescued in neurons. Compared with wild  
93 type, the *slo-2(gf)* strain displayed much larger outward currents, and greatly decreased PSC burst  
94 frequency, duration and charge transfer (**Fig. 1 C and D**). These phenotypes of *slo-2(gf)* were mostly  
95 suppressed in the *slo-2(gf);adr-1(zw96)* strain (**Fig. 1 C and D**), suggesting that *adr-1(lf)* alleviated the  
96 sluggish phenotype through inhibiting SLO-2(*gf*). In addition, expression of wild-type *adr-1* in neurons of  
97 *slo-2(gf);adr-1(zw96)* restored the effects of *slo-2(gf)* on whole-cell currents of VA5 and PSC bursts (**Fig.**  
98 **1 C and D**). These observations suggest that inhibition of SLO-2 activity in motor neurons is likely a major  
99 contributor to the suppressing effect of *adr-1(lf)* on the *slo-2(gf)* sluggish phenotype.

100 We suspected that the suppression of SLO-2(*gf*) by *adr-1(lf)* resulted from deficient RNA-editing. If so,  
101 *adr-2(lf)* might similarly suppress the sluggish phenotype of *slo-2(gf)* as did *adr-1(lf)* because ADR-2 is  
102 required for RNA editing. Indeed, the sluggish phenotype of *slo-2(gf)* worms was substantially alleviated  
103 in *slo-2(gf);adr-2(lf)* double mutants (**Fig. 2A**). Also, the augmenting effect of *slo-2(gf)* on VA5 whole-cell  
104 outward currents was mostly abolished by *adr-2(lf)* (**Fig. 2B**). Furthermore, *adr-2(lf)* brought VA5 whole-  
105 cell currents below the wild-type level (**Fig. 2B**), which presumably resulted from reduced activities of  
106 wild-type SLO-2. These results suggest that RNA editing is important to SLO-2 function in neurons.

### 107 *ADR-1 is expressed in neurons and localized in the nucleus*

108 The expression pattern of *adr-1* was examined by expressing GFP under the control of *adr-1* promoter  
109 (*Padr-1*). In transgenic worms, strong GFP expression was observed in the nervous system, including  
110 ventral cord motor neurons and many neurons in the head and tail, and weak GFP expression was observed  
111 in the intestine and body-wall muscles (**Fig. 3A**). We then examined the subcellular localization pattern of  
112 ADR-1 by expressing GFP-tagged full-length ADR-1 (ADR-1::GFP) under the control of *Prab-3*. We  
113 found that ADR-1::GFP is localized in the nucleus, as indicated by its colocalization with the mStrawberry-  
114 tagged nucleus marker HIS-58 (Liu et al., 2018) in ventral cord motor neurons (**Fig. 3B**).

115 To determine whether *adr-1* is co-expressed with *slo-2*, we crossed the *Padr-1::GFP* transgene into an  
116 existing strain expressing *Pslo-2::mStrawberry* (Liu et al., 2018). We found that the expression patterns of  
117 *adr-1* and *slo-2* overlapped extensively in the nervous system (**Fig. 3C**). For example, the majority of  
118 ventral cord motor neurons and numerous head neurons were colabeled by GFP and mStrawberry (**Fig. 3C**).  
119 The occasional non-overlapping expressions of GFP and mStrawberry in ventral cord motor neurons  
120 probably resulted from mosaic expression of the transgenes.

### 121 *ADR-1 regulates neurotransmitter release through SLO-2*

122 SLO-2 is the primary conductor of delayed outward currents in *C. elegans* cholinergic motor neurons (Liu  
123 et al., 2014). We wondered whether the function of native SLO-2 channels in motor neurons depends on  
124 ADR-1. Consistent with our previous report (Liu et al., 2014), VA5 delayed outward currents were

125 dramatically smaller and VA5 resting membrane potential was much less hyperpolarized in *slo-2(lf)* than  
126 wild type. While *adr-1(lf)* also caused significantly decreased outward currents and less hyperpolarized  
127 resting membrane potential in VA5, it did not produce additive effects when combined with *slo-2(lf)* (**Fig.**  
128 **4 A-C**). These results suggest that *adr-1(lf)* affects motor neuron outward current and resting membrane  
129 potential through SLO-2.

130 We next determined whether *adr-1(lf)* also alters PSC bursts. We found that *adr-1(lf)* caused an increase  
131 in the duration and mean charge transfer rate of PSC bursts without altering the burst frequency compared  
132 with wild type (**Fig. 4 D and E**). These phenotypes of *adr-1(lf)* were similar to those of *slo-2(lf)* and did not  
133 become more severe in the double mutants (**Fig. 4 D and E**), suggesting that ADR-1 modulates  
134 neurotransmitter release through SLO-2. The similar effects of *adr-1(lf)* and *slo-2(lf)* on PSC bursts are in  
135 contrast to their differential effects on VA5 outward currents and resting membrane potential. This  
136 discrepancy suggests that there might be a threshold level of SLO-2 deficiency to cause a similar change in  
137 PSC bursts.

#### 138 *ADR-1 regulates SLO-2 function through SCYL-1*

139 Given that our results suggest that RNA editing is important to SLO-2 function, we determined whether  
140 *adr-1(lf)* causes deficient editing or decreased expression of *slo-2* mRNA by comparing RNA-seq data  
141 between *adr-1(lf)* and wild type. The *adr-1(zw96)* allele was chosen for these analyses to minimize potential  
142 complications by mutations of other genes introduced in *adr-1* mutants isolated from the genetic screen.  
143 Unexpectedly, no RNA editing event was detected in *slo-2* transcripts, and *slo-2* mRNA level was similar  
144 between wild type and the *adr-1* mutant (**Fig. 4-figure supplement 1**). These results suggest that ADR-1  
145 might regulate SLO-2 function through RNA editing of another gene.

146 A previous study identified 270 high-confidence editing sites in transcripts of 51 genes expressed in *C.*  
147 *elegans* neurons (Washburn et al., 2014). We suspected that the putative molecule mediating the effect of  
148 ADR-1 on SLO-2 might be encoded by one of these genes, and the mRNA level of this gene may have  
149 reduced expression in *adr-1(lf)*. Therefore, we compared transcript expression levels of these genes

150 (excluding those encoding transposons) quantified from our RNA-Seq data between wild type and *adr-*  
151 *I(zw96)*. The transcripts of most genes showed either no decrease or only a small decrease, but two of these  
152 genes, *mcs-1* and *scyl-1*, were reduced greatly in *adr-1(lf)* compared with wild type (**Fig. 5**). *mcs-1* is not  
153 a conceivable candidate for the putative SLO-2 regulator because it is a non-coding gene expressed in the  
154 hypodermis and vulva (Hellwig and Bass, 2008). On the other hand, *scyl-1* is a promising candidate because  
155 it encodes an orthologue of mammalian SCYL1 important to neuronal function and survival (Pelletier,  
156 2016). We therefore focused our analyses on *scyl-1*. Like its mammalian homologs, SCYL-1 has an amino-  
157 terminal kinase domain that lacks residues critical to kinase activity, and a central domain containing five  
158 HEAT repeats (HEAT for *H*untingtin, *e*longation factor 3, protein phosphatase 2A, yeast kinase *T*OR1)  
159 (Pelletier, 2016). SCYL-1 shares 38% identity and 60% similarity with human SCYL1. Notably, amino  
160 acid sequence in the HEAT domain, which is often highly degenerative (Pelletier, 2016), shows a very high  
161 level of sequence homology (53% identity and 76% similarity) between these two proteins (**Fig. 5-figure**  
162 **supplement 1**).

163 We first examined the expression pattern of *scyl-1* by expressing GFP reporter under the control of *scyl-*  
164 *I* promoter (*Pscyl-1*). An *in vivo* homologous recombination approach was used in this experiment to  
165 include a large fragment of genomic DNA sequence upstream of the *scyl-1* initiation site. Specifically, a  
166 0.5-kb genomic fragment upstream of the *scyl-1* initiation site was cloned by PCR and fused to GFP. The  
167 resultant plasmid was co-injected with a fosmid covering part of the *scyl-1* coding region and 32 kb  
168 sequence upstream of the initiation site into wild type worms. *In vivo* homologous recombination between  
169 the plasmid and the fosmid is expected to result in a *Pscyl-1::GFP* transcriptional fusion that includes all  
170 the upstream sequence in the fosmid. After successful creation of a transgenic strain expressing the *Pscyl-*  
171 *I::GFP* transcriptional fusion, we crossed the transgene into the *Pslo-2::mStrawberry* strain, and examined  
172 the expression patterns of GFP and mStrawberry. We observed co-expression of *scyl-1* and *slo-2* in many  
173 ventral cord motor neurons (**Fig. 6**). However, most other neurons expressing *slo-2* (*e. g.* head and tail  
174 neurons) did not appear to express *scyl-1*. In addition, *scyl-1* expression was detected in some cells that did



175 not express *slo-2*, including the excretory cell, spermatheca, vulval muscle cells, and intestinal cells (**Fig.**  
176 **6**).

177 We next determined whether SCYL-1 is related to SLO-2 function. To this end, we created a mutant,  
178 *scyl-1(zw99)*, by introducing a stop codon after isoleucine 152 using the CRISPR/Cas9 approach, and  
179 examined the effect of this mutation on VA5 delayed outward currents. *scyl-1(zw99)* showed a substantial  
180 decrease in VA5 outward currents compared with wild type; and this phenotype was non-additive with that  
181 of *slo-2(lf)* and could be rescued by expressing wild type SCYL-1 in neurons (**Fig. 7A**). These results  
182 suggest that SCYL-1 contributes to SLO-2-dependent outward currents.

183 The decrease of delayed outward currents in *scyl-1(lf)* could have resulted from decreased expression or  
184 function of SLO-2. We first determined whether *scyl-1(lf)* alters SLO-2 expression by crossing a stable  
185 (near 100% penetrance) *Prab-3::SLO-2::GFP* transgene from an existing transgenic strain of wild-type  
186 genetic background (Liu et al., 2018) into *scyl-1(zw99)*, and comparing GFP signal between the two strains.  
187 We found that GFP signal in the ventral nerve cord was similar between wild type and the *scyl-1* mutant  
188 (**Fig. 7B**), suggesting that SCYL-1 does not regulate SLO-2 expression. We then determined whether  
189 SCYL-1 regulates SLO-2 function by obtaining inside-out patches from VA5 and analyzing SLO-2 single-  
190 channel properties. SLO-2 showed >50% decrease in open probability ( $P_o$ ) without a change of single-  
191 channel conductance in *scyl-1(zw99)* compared with wild type, and this mutant phenotype was completely  
192 rescued by neuronal expression of wild-type SCYL-1 (**Fig. 8A**). Analyses of single-channel open and  
193 closed events revealed that SLO-2 has two open states and three closed states, and that the decreased  $P_o$  of  
194 SLO-2 in *scyl-1(lf)* mainly resulted from decreased events of long openings (**Fig. 8B**) and increased events  
195 of long closures (**Fig. 8C**).

196 The observed effects of *scyl-1(lf)* on SLO-2 single-channel properties suggest that SCYL-1 may  
197 physically interact with SLO-2. We performed bimolecular fluorescence complementation (BiFC) assays  
198 (Hu et al., 2002) to test this possibility. In these assays, full-length SCYL-1 tagged with the carboxyl  
199 terminal portion of YFP (YFPc) was coexpressed in neurons with either full-length, amino terminal portion,  
200 or carboxyl terminal portion of SLO-2 tagged with the amino terminal portion of YFP (YFPa) (**Fig. 9A**).

201 YFP fluorescence was observed in ventral cord motor neurons when either the full-length or the C-terminal  
202 portion of SLO-2 was used but not when the N-terminal protein was used in the assays (**Fig. 9B**). These  
203 results suggest that SCYL-1 physically interacts with SLO-2, and this interaction depends on SLO-2  
204 carboxyl terminal portion.

#### 205 *scyl-1* expression depends on RNA editing at a specific 3'-UTR site

206 Our RNA-Seq data revealed eight high-frequency (>15%) adenosine-to-guanosine editing sites in *scyl-1*  
207 transcripts of wild type (**Fig. 10A**). All these editing sites are located within a predicted 746 bp hair-pin  
208 structure in the 3' end of *scyl-1* pre-mRNA, which contains an inverted repeat with >98% complementary  
209 base pairing (**Fig. 10B**). Interestingly, RNA editing at only one of the eight sites was significantly  
210 undermined (by 74%) in *adr-1(zw96)* compared with wild type (**Fig. 10A**). Sanger sequencing of *scyl-1*  
211 mRNA and the corresponding genomic DNA from wild type, *adr-1(zw96)*, and *adr-2(gv42)* confirmed that  
212 RNA editing at this specific site was deficient in both the *adr-1* and *adr-2* mutants whereas editing at an  
213 adjacent site was deficient only in the *adr-2* mutant (**Fig. 10C**), suggesting that RNA editing at the site  
214 impaired by *adr-1(lf)* might be important to *scyl-1* expression. To test this possibility, we fused GFP coding  
215 sequence in-frame to a genomic DNA fragment covering part of the last exon of *scyl-1* and 5 kb downstream  
216 sequence, and expressed it in neurons under the control of *Prab-3* (**Fig. 10D**). We also made a modified  
217 plasmid construct in which adenosine (A) was changed to guanosine (G) at the specific ADR-1-dependent  
218 editing site to mimic the editing (**Fig. 10D**). In transgenic worms harboring the original genomic sequence,  
219 no GFP signal was detected in neurons (**Fig. 10E**). In contrast, strong GFP signal was observed in neurons  
220 of transgenic worms expressing the A-to-G mutated genomic sequence (**Fig. 10E**). Taken together, the  
221 results suggest that ADR-1 plays a key role in *scyl-1* expression by promoting RNA editing at a specific  
222 site in its 3'-UTR.

#### 223 *Human Slo2.2/Slack is regulated by SCYL1*

224 The HEAT domain of SCYL proteins play important roles in protein-protein interactions but generally  
225 varies considerably in amino acid sequence for interactions with different partners (Yoshimura and Hirano,

226 2016). The high level of sequence homology of the HEAT domain between mammalian SCYL1 and worm  
227 SCYL-1 (**Fig. 5-figure supplement 1**) promoted us to test whether mammalian Slo2.2/Slack is also  
228 regulated by SCYL1. We expressed human Slack either alone or together with mouse SCYL1 in *Xenopus*  
229 oocytes, and analyzed Slack single-channel properties. Coexpression of SCYL1 caused ~130% increase in  
230 Slack  $P_o$  (**Fig. 11A**). The channel has at least two open states and two closed states. SCYL1 increased the  
231 duration and proportion of the long open state; and decreased the proportion but increased the duration of  
232 the long closed state (**Fig. 11 B and C**). These effects of SCYL1 on Slack are similar to those of SCYL-1  
233 on SLO-2 single-channel properties (**Fig. 8**), suggesting that regulation of Slo2 channel function is likely a  
234 conserved physiological function of SCYL-1/SCYL1 proteins.

235

## 236 Discussion

237 This study shows that both ADR-1 and SCYL-1 are critical to SLO-2 physiological function in neurons.  
238 While ADR-1 enhances SLO-2 function indirectly through regulating the expression level of SCYL-1, the  
239 latter do so directly. These conclusions are supported by multiple lines of evidence, including the isolation  
240 of *adr-1(lf)* mutants as suppressors of SLO-2(*gf*), the inhibition of SLO-2 activities by either *adr-1(lf)* or  
241 *scyl-1(lf)*, the reduction of *scyl-1* transcript expression in *adr-1(lf)* and correlation between *scyl-1* RNA  
242 editing and gene expression, the SLO-2 carboxyl terminal-dependent reconstitution of YFP fluorophore in  
243 BiFC assays with SCYL-1, and the inhibitory effects of *scyl-1(lf)* on SLO-2 single-channel activities.  
244 Importantly, we found that the human Slack is also regulated by SCYL1.

245 The biological significance of RNA editing at non-coding regions is only beginning to be appreciated.  
246 A recent study with *C. elegans* identified many neural-specific A-to-I editing sites in the 3'-UTR of *clec-*  
247 *41*, and found that *adr-2(lf)* causes both an elimination of these editing events and a chemotaxis defect  
248 (Deffit et al., 2017). Although it is unclear how *clec-41* expression is controlled by these editing events,  
249 and a direct link between the chemotaxis defect of *adr-2(lf)* mutant and the decreased *clec-41* expression  
250 remains to be established, these results suggest that RNA editing at non-coding regions might have

251 important biological functions. In the present study, we demonstrate that A-to-I RNA editing at the 3'UTR  
252 of *scyl-1* controls its expression, and that SCYL-1 contributes to neuronal whole-cell currents through a  
253 direct effect on the SLO-2 channel. The results of these two studies have provided a glimpse of the  
254 biological roles of 3'-UTR RNA editing in gene expression and neuronal function.

255 Our results demonstrate that RNA editing at a single site in the 3'-UTR could have a profound effect in  
256 promoting gene expression. The A-to-I conversion at the specific editing site of *scyl-1* increases base  
257 pairing in the putative double-stranded structure of the 3'-UTR (**Fig. 10B**). Increased base pairing in a  
258 double-stranded RNA generally facilitates RNA degradation. It is therefore intriguing how such an  
259 increased pairing in the 3'-UTR may cause increased gene expression. One possibility is that editing at this  
260 site helps recruit a specific RNA-binding protein to the 3'-UTR to prevent *scyl-1* mRNA from degradation.  
261 Although the exact mechanism remains to be determined, it is a remarkable first example that a specific  
262 RNA editing site at the 3'UTR plays a crucial role in gene expression.

263 SCYL1 proteins are evolutionarily conserved proteins that share an N-terminal pseudokinase domain  
264 (Manning et al., 2002; Pelletier, 2016). Results of previous studies with cultured cells suggest that SCYL1  
265 may regulate intracellular trafficking processes between the Golgi apparatus and the ER (Burman et al.,  
266 2008; Burman et al., 2010), and facilitate nuclear tRNA export by acting at the nuclear pore complex (Chafe  
267 and Mangroo, 2010). Mutations of SCYL1 in humans are associated with a variety of disorders, including  
268 neurodegeneration, intellectual disabilities, and liver failure (Lenz et al., 2018; Li et al., 2019; Schmidt et  
269 al., 2015; Shohet et al., 2019; Spagnoli et al., 2018, 2019). Mice with SCYL1 deficiency show an early  
270 onset and progressive neurodegenerative disorder (Pelletier et al., 2012). However, it is unclear whether the  
271 documented mutant phenotypes of SCYL1 are related to its known roles in intracellular trafficking and  
272 nuclear tRNA export (Pelletier, 2016). The results of this study indicate a new role of SCYL1/SCYL-1  
273 proteins: regulating Slo2 channels. What might be the molecular mechanism through which SCYL-1  
274 enhances SLO-2 activity? Since SCYL-1 physically associates with SLO-2, and enhances SLO-2 single-  
275 channel  $P_o$  through altering the open and closed states, it likely regulates channel function either directly or  
276 through a closely associated protein. The fact that human Slack  $P_o$  is augmented by mouse SCYL1 through

277 effects on the open and closed states lends further support to the notion that SCYL1/SCYL-1 may regulate  
278 Slo2 channel activities through close interactions. While the exact mechanism remains to be determined,  
279 the observed large effects of SCYL-1/SCYL1 proteins on channel activities suggest that they are likely a  
280 major player in SLO-2/Slo2 physiological function.

281 The expression patterns of *scyl-1* and *slo-2* largely do not overlap. Although they are coexpressed in  
282 ventral cord motor neurons, where SCYL-1 is required for SLO-2 physiological function, most other  
283 neurons expressing *slo-2* do not express *scyl-1*, suggesting that the regulatory effect of SCYL-1 on SLO-2  
284 is cell- and tissue-specific. Furthermore, *scyl-1* expression was observed in a variety of cells that do not  
285 express *slo-2*, suggesting that SCYL-1 physiological functions are not limited to regulating SLO-2. In  
286 mouse, SCYL1 and Slack are both expressed in the hippocampus and cerebellum, but their reported  
287 expression patterns do not completely overlap (Joiner et al., 1998; Schmidt et al., 2007). Conceivably, Slack  
288 channels might also exhibit cell- and tissue-specific dependence on SCYL1, and SCYL1 proteins likely  
289 perform other functions besides regulating Slack channels. The pleiotropic phenotypes associated with  
290 mutations of SCYL1 (Lenz et al., 2018; Li et al., 2019; Pelletier et al., 2012; Schmidt et al., 2015; Shohet  
291 et al., 2019; Spagnoli et al., 2018, 2019) support the notion that SCYL1 proteins are also important to other  
292 physiological functions.

293 In summary, this study demonstrates that ADAR-mediated RNA editing controls the expression of  
294 SCYL-1, which interacts with SLO-2 to allow SLO-2 perform its physiological functions. Moreover, this  
295 study shows that this regulatory mechanism is conserved with mammalian SCYL1 and Slo2. Our findings  
296 reveal a new molecular mechanism of Slo2 channel regulation, and provide the bases for investigating how  
297 Slo2 physiological functions are regulated by SCYL1, and whether the neurodegeneration and intellectual  
298 disability phenotypes of SCYL1 mutations are related to Slo2 channel dysfunction.

## 299 **Materials and Methods**

300 *C. elegans* culture and strains

301 *C. elegans* hermaphrodites were grown on nematode growth medium (NGM) plates spotted with a layer of  
302 OP50 *Escherichia coli* at 22°C inside an environmental chamber. The following strains were used in this  
303 study (plasmids used in making the transgenic strains are indicated by numbers with a “wp” prefix): wild  
304 type (Bristol N2). LY101: *slo-2(nf101)*. ZW860: *zwIs139[Pslo-1::slo-2(gf)(wp1311), Pmyo-2::YFP(wp214)]*.  
305 ZW876: *zwIs139[Pslo-1::slo-2(gf)(wp1311), Pmyo-2::YFP(wp214)]; adr-1(zw80)*.  
306 ZW877: *zwIs139[Pslo-1::slo-2(gf)(wp1311), Pmyo-2::YFP(wp214)]; adr-1(zw81)*. ZW983:  
307 *zwIs139[Pslo-1::slo-2(gf)(wp1311), Pmyo-2::YFP(wp214)]; adr-2(gv42)*. ZW1002: *adr-2(gv42)*.  
308 ZW1049: *zwEx221[Prab-3::slo-2::GFP]*. ZW1388: *zwEx260[Prab-3::His-58::mStrawberry(p1749),*  
309 *Prab-3::adr-1::GFP(p1374)]*. ZW1394: *adr-1(zw96)*. ZW1401: *zwEx261[Padr-1::GFP(wp1872), lin-*  
310 *15(+)]*; *lin-15(n765)*. ZW1406: *zwEx262[Prab-3::adr-1::GFP(p1374), Pmyo-2::mStrawberry (wp1613)];*  
311 *adr-1(zw96)*. ZW1407: *zwIs139[Pslo-1::slo-2(gf)(wp1311), Pmyo-2::YFP(wp214)]; adr-1(zw96)*.  
312 ZW1408: *zwIs139[Pslo-1::slo-2(gf)(wp1311), Pmyo-2::YFP(wp214)]; zwEx262[Prab-3::adr-*  
313 *1::GFP(p1374);Pmyo-2::mStrawberry (wp1613)]; adr-1(zw96)*. ZW1409: *scyl-1(zw99)*. ZW1410: *slo-*  
314 *2(nf101)*; *scyl-1(zw99)*. ZW1415: *zwEx221[Prab-3::slo-2::GFP]; scyl-1(zw99)*. ZW1416: *zwEx247[Pslo-*  
315 *2::mStrawberry(wp1776), lin-15(+)]*; *zwEx263[Pscyl-1::GFP(wp1901+wp1902), lin-15(+)]*; *lin-*  
316 *15(n765)*. ZW1417: *zwEx264[Prab-3::scyl-1(wp1912), Pmyo-2::mStrawberry (wp1613)]; scyl-1(zw99)*.  
317 ZW1418: *zwEx247[Pslo-2::mStrawberry(wp1776), lin-15(+)]*; *zwEx261[Padr-1::GFP(wp1872), lin-*  
318 *15(+)]*; *lin-15(n765)*. ZW1419: *zwEx265[Prab-3::GFP::scyl-1 3'UTR(wp1923), lin-15(+)]*; *lin-15(n765)*.  
319 ZW1420: *zwEx266[Prab-3::GFP::scyl-1 3'UTR(A-to-G)(wp1924), lin-15(+)]*; *lin-15(n765)*. ZW1428:  
320 *slo-2(nf101)*; *adr-1(zw96)*. ZW1505: *zwEx273[Prab-3::scyl-1::YFPc(wp1952), Prab-3::slo-*  
321 *2::YFPa(wp1783), lin-15(+)]*; *lin-15(n765)*. ZW1506: *zwEx274[Prab-3::scyl-1::YFPc(wp1952), Prab-*  
322 *3::slo-2N::YFPa(wp1784), lin-15(+)]*; *lin-15(n765)*. ZW1507: *zwEx275[Prab-3::scyl-1::YFPc(wp1952),*  
323 *Prab-3::slo-2C::YFPa(wp1785), lin-15(+)]*; *lin-15(n765)*.

324 *Mutant screening and mapping*

325 An integrated transgenic strain expressing *P<sub>slo-1</sub>::SLO-2(gf)* and *P<sub>myo-2</sub>::YFP* (transgenic marker) in the  
326 wild-type genetic background was used for mutant screen. L4-stage *slo-2(gf)* worms were treated with the  
327 chemical mutagen ethyl methanesulfonate (50 mM) for 4 hours at room temperature. F2 progeny from the  
328 mutagenized worms were screened under stereomicroscope for animals that moved better than the original  
329 *slo-2(gf)* worms. 17 suppressors were isolated in the screen and were subjected to whole-genome  
330 sequencing. Analysis of the whole-genome sequencing data showed that 2 mutants have mutations in the  
331 *adr-1* gene (www.wormbase.com). Identification of *adr-1* mutants was confirmed by the recovery of the  
332 sluggish phenotype when a wild-type cDNA of *adr-1* under the control of *Prab-3* was expressed in *slo-*  
333 *2(gf);adr-1(zw81)* double mutants.

#### 334 *Generation of adr-1 and scyl-1 knockout mutants*

335 The CRISPR/Cas9 approach (Dickinson et al., 2013) was used to create *adr-1* and *scyl-1* knockouts. The  
336 guide RNA sequences for *adr-1* and *scyl-1* are 5'- CCAGTTTTCGAAGCTTCGG and 5'-  
337 GAGGAGATTGGAAAATTGG, which were inserted into pDD162 (*P<sub>eft-3</sub>::Cas9* + Empty *sgRNA*;  
338 Addgene #47549), respectively. The resultant plasmids (*wp1645* for *adr-1* and *wp1887* for *scyl-1*) were  
339 injected into wild type worms, respectively, along with a repair primer (5'-  
340 GAGAAGTATTCACCAGTTTTCGAAGCTTAATGAGTTCCAAAAGATCCAGAGATTCCCGAA for  
341 *adr-1*, and 5'-  
342 TTGTAACAGCCGGAGGAGATTGGAAAATCTAGCTGGTGGACTTCATTTGGTCACTGGATT for  
343 *scyl-1*) and *P<sub>myo-2</sub>::mStrawberry* (*wp1613*) as the transgenic marker. The *adr-1* knockout worms were  
344 identified by PCR using primers 5'-TCACCAGTTTTCGAAGCTTAATGA (forward) and 5'-  
345 TCTTCTGCTGGCTCACATTCA (reverse). The *scyl-1* knockout worms were identified by PCR using  
346 primers 5'- CCGAAGTCCCAATTCCCAT (forward) and 5'- CCAAATGAAGTCCACCAGCTAG  
347 (reverse). The knockout worms were confirmed by Sanger sequencing.

#### 348 *Analysis of expression pattern and subcellular localization*

349 The expression pattern of *adr-1* was assessed by expressing GFP under the control of 1.8-kb *adr-1* promoter  
350 (*Padr-1::GFP*, *wp1872*). Primers for cloning *Padr-1* are 5'-  
351 TAAGGTACCAAGGACACGTTGCATATGAAT (forward) and 5'-  
352 TTTACCGGTTGGCTGACATATTGTGGGA (reverse). Subcellular localization of ADR-1 was  
353 determined by fusing GFP to its carboxyl terminus and expressing the fusion protein under the control of  
354 *Prab-3* (*Prab-3::adr-1::GFP*, *wp1374*). Primers for cloning *adr-1* cDNA are 5'-  
355 AAAGCGGCCGCATGGATCAAAATCCTAACTACAA (forward) and 5'-  
356 TTTACCGGTCCATCGAAAGCAGCAAGAGTGAAG (reverse). A plasmid (*wp1749*) harboring *Prab-*  
357 *3::his-58::mStrawberry* serves as a nucleus marker. The expression pattern of *scyl-1* was assessed by an *in*  
358 *vivo* recombination approach. Specifically, a 0.5 kb fragment immediately upstream of *scyl-1* initiation site  
359 was cloned and fused to GFP using the primers 5'- AATCTGCAGCATCGGCACGAGAAGTACA  
360 (forward) and 5'- TTAGGATCCCTAAAAGTGATCGAAATTTA (reverse). The resultant plasmid (*Pscyl-*  
361 *1::GFP*, *wp1902*) was linearized and co-injected with a linearized (fosmid WRM068bA03), which contains  
362 32 kb of *scyl-1* upstream sequence and part of its coding region, into the *lin-15(n765)* strain along with a  
363 *lin-15* rescue plasmid to serve as a transformation marker. To assay the effect of the identified adenosine  
364 site at the 3'UTR of *scyl-1* on gene expression, a 5.1 kb genomic DNA fragment covering part of the *scyl-*  
365 *1* last exon and subsequent sequence was cloned and fused in-frame to GFP using the primers 5'-  
366 AATGCTAGCATGCAGGCTAGAAATGAAGCTCG (forward) and 5'-  
367 TATGGGCCCCGAAATCAGCATCTTTGACGAA (reverse). To mimic the A-to-I editing at the identified  
368 specific site, a second plasmid was made by mutating the specific adenosine to guanosine in the above  
369 plasmid. The two resultant plasmids were injected into *lin-15(n765)*, respectively, with a *lin-15* rescue  
370 plasmid as the transgenic marker. Images of transgenic worms were taken with a digital CMOS camera  
371 (Hamamatsu, C11440-22CU) mounted on a Nikon TE2000-U inverted microscope equipped with  
372 EGFP/FITC and mCherry/Texas Red filter sets (49002 and 49008, Chroma Technology Corporation,  
373 Rockingham, VT, USA).



374 *Behavioral assay*

375 Locomotion velocity was determined using an automated locomotion tracking system as described  
376 previously (Wang and Wang, 2013). Briefly, a single adult hermaphrodite was transferred to an NGM plate  
377 without food. After allowing ~30 sec for recovery from the transfer, snapshots of the worm were taken at  
378 15 frames per second for 30 s using a IMAGINGSOURCE camera (DMK37BUX273) mounted on a  
379 stereomicroscope (LEICA M165FC). The worm was constantly kept in the center of the view field with a  
380 motorized microscope stage (OptiScan™ ES111, Prior Scientific, Inc., Rockland, MA, USA). Both the  
381 camera and the motorized stage were controlled by a custom program running in MATLAB (The  
382 MathWorks, Inc., Natick, MA).

383 *RNA-seq and data analysis*

384 Total RNA was extracted from young adult-stage worms using TRIzol Reagent (Invitrogen) and treated  
385 with TURBO DNase (Ambion). RNA-seq was performed by Novogene Corp. Sacramento, CA  
386 Raw reads were filtered using Trim Galore software  
387 ([http://www.bioinformatics.babraham.ac.uk/projects/trim\\_galore/](http://www.bioinformatics.babraham.ac.uk/projects/trim_galore/)) to remove reads containing adapters or  
388 reads of low quality. The filtered reads were mapped to *C. elegans* genome (*ce11*) using TopHat2 (Kim et  
389 al., 2013). The gene expression level is estimated by counting the reads that map to exons.

390 *Bimolecular fluorescence complementation (BiFC) assay*

391 BiFC assays were performed by coexpressing SLO-2 and SCYL-1 tagged with the amino and carboxyl  
392 terminal portions of YFP (YFPa and YFPc), respectively, in neurons under the control of *rab-3* promoter  
393 (*Prab-3*). To assay which portion of SLO-2 may interact with SCYL-1, the full-length, N-terminal, and C-  
394 terminal portion of SLO-2 were fused with YFPa, respectively. The resultant plasmids (*wp1783*, *Prab-3::SLO-2::YFPa*; *wp1784*, *Prab-3::SLO-2N::YFPa*, and *wp1785*, *Prab-3::SLO-2C::YFPa*) were  
395 coinjected with *Prab-3::SCYL-1::YFPc* (*wp1952*), respectively, into *lin-15(n765)* strain. A *lin-15* rescue  
396 plasmid was also coinjected to serve as a transformation marker. Epifluorescence of the transgenic worms  
397 was visualized and imaged as described above.  
398

399 *C. elegans electrophysiology*

400 Adult hermaphrodites were used in all electrophysiological experiments. Worms were immobilized and  
401 dissected as described previously (Liu et al., 2007). Borosilicate glass pipettes were used as electrodes for  
402 recording whole-cell currents. Pipette tip resistance for recording muscle cell currents was 3-5 M $\Omega$  whereas  
403 that for recording motor neuron currents was ~20 M $\Omega$ . The dissected worm preparation was treated briefly  
404 with collagenase and perfused with the extracellular solution for 5 to 10-fold of bath volume. Classical  
405 whole-cell configuration was obtained by applying a negative pressure to the recording pipette. Current-  
406 and voltage-clamp experiments were performed with a Multiclamp 700B amplifier (Molecular Devices,  
407 Sunnyvale, CA, USA) and the Clampex software (version 10, Molecular Devices). Data were sampled at a  
408 rate of 10 kHz after filtering at 2 kHz. Spontaneous membrane potential changes were recorded using the  
409 current-clamp technique without current injection. Motor neuron whole-cell outward currents were  
410 recorded by applying a series of voltage steps (-60 to +70 mV at 10-mV intervals, 1200 ms pulse duration)  
411 from a holding potential of -60 mV. Spontaneous PSCs were recorded from body-wall muscle cells at a  
412 holding potential of -60 mV. Two bath solutions and three pipette solutions were used in  
413 electrophysiological experiments as specified in figure legends. Bath solution I contained (in mM) 140  
414 NaCl, 5 KCl, 5 CaCl<sub>2</sub>, 5 MgCl<sub>2</sub>, 11 dextrose and 5 HEPES (pH 7.2). Bath solution II contained (in mM)  
415 100 K<sup>+</sup> gluconate, 50 KCl, 1 Mg<sup>2+</sup> gluconate, 0.1 Ca<sup>2+</sup> gluconate and 10 HEPES (pH 7.2). Pipette solution  
416 I contained (in mM) 120 KCl, 20 KOH, 5 Tris, 0.25 CaCl<sub>2</sub>, 4 MgCl<sub>2</sub>, 36 sucrose, 5 EGTA, and 4 Na<sub>2</sub>ATP  
417 (pH 7.2). Pipette solution II differed from pipette solution I in that 120 KCl was substituted by K<sup>+</sup> gluconate.  
418 Pipette solution III contained (in mM) 150 K<sup>+</sup> gluconate, 1 Mg<sup>2+</sup> gluconate and 10 HEPES (pH 7.2).

419 *Xenopus oocytes expression and electrophysiology*

420 A construct containing human *Slack* cDNA (pOX + *hSlo2.2*, a gift from Dr. Salkoff) was linearized with  
421 Pvu I. The mouse *Scyl1* cDNA was amplified from a construct (MR210762, Origene) and cloned into an  
422 existing vector downstream of the T3 promoter. The resultant plasmid (*wp1982*) was linearized with  
423 NgoM4. Capped cRNAs were synthesized using the mMessage mMachine Kit (Ambion). Approximately

424 50 nl cRNA of either *Slack* alone (0.5 ng/nl) or *Slack* (0.5 ng/nl) plus *Scyll1* (0.5 ng/nl) was injected into  
425 each oocyte using a Drummond Nanoject II injector (Drummond Scientific). Injected oocytes were  
426 incubated at 18°C in ND96 medium (in mM): 96 NaCl, 2 KCl, 1.8 CaCl<sub>2</sub>, 1 MgCl<sub>2</sub>, 5 HEPES (pH 7.5). 2  
427 to 3 days after cRNA injection, single channel recordings were made in inside-out patches with a  
428 Multiclamp 700B amplifier (Molecular Devices, Sunnyvale, CA, USA) and the Clampex software (version  
429 10, Molecular Devices). Data were sampled at 10 kHz after filtering at 2 kHz. Bath solution contained (in  
430 mM) 60 NaCl, 40 KCl, 50 K<sup>+</sup> gluconate, 10 KOH, 5 EGTA, and 5 HEPES (pH 7.2). Pipette solution  
431 contained (in mM) 100 K<sup>+</sup> gluconate, 60 Na<sup>+</sup> gluconate, 2 MgCl<sub>2</sub>, and 5 HEPES (pH 7.2).

#### 432 *Data Analyses for Electrophysiology*

433 Amplitudes of whole-cell currents in response to voltage steps were determined from the mean current  
434 during the last 100 ms of the 1200-ms voltage pulses using the Clampfit software. The duration and charge  
435 transfer of PSC bursts were quantified with Clampfit software (version 10, Molecular Devices) as  
436 previously described (Liu et al., 2013). The frequency of PSC bursts was counted manually. For single  
437 channel analysis, the QuB software (<https://qub.mandelics.com/>) was used to fit open and closed times to  
438 exponentials, and to quantify the  $\tau$  values and relative areas of the fitted components, which were  
439 automatically determined by the software. The first 30 sec recording of each experiment was used in such  
440 analyses. Statistical comparisons were made with Origin Pro 2019 (OriginLab Corporation, Northampton,  
441 MA) using either ANOVA or unpaired *t*-test as specified in figure legends.  $p < 0.05$  is considered to be  
442 statistically significant. The sample size (*n*) equals the number of cells or membrane patches analyzed. All  
443 values are shown as mean  $\pm$  SE and data graphing was done with Origin Pro 2019.

444

#### 445 **Acknowledgements**

446 This work was supported by National Institute of Health (R01GM113004 to B.C, and 2R01MH085927  
447 and 1R01NS109388 to Z.-W.W.). We thank Dr. Laurence Salkoff for the human *Slack* construct. Some

448 strains were provided by the CGC, which is funded by NIH Office of Research Infrastructure Programs  
449 (P40 OD010440).

450

## 451 **References**

- 452 Ambrosino, P., Soldovieri, M.V., Bast, T., Turnpenny, P.D., Uhrig, S., Biskup, S., Docker, M., Fleck, T.,  
453 Mosca, I., Manocchio, L., *et al.* (2018). De novo gain-of-function variants in KCNT2 as a novel cause of  
454 developmental and epileptic encephalopathy. *Ann Neurol* 83, 1198-1204.
- 455 Basilio, C., Wahba, A.J., Lengyel, P., Speyer, J.F., and Ochoa, S. (1962). Synthetic polynucleotides and the  
456 amino acid code. *V. Proc Natl Acad Sci U S A* 48, 613-616.
- 457 Bhalla, T., Rosenthal, J.J., Holmgren, M., and Reenan, R. (2004). Control of human potassium channel  
458 inactivation by editing of a small mRNA hairpin. *Nat Struct Mol Biol* 11, 950-956.
- 459 Bhattacharjee, A., Gan, L., and Kaczmarek, L.K. (2002). Localization of the Slack potassium channel in the  
460 rat central nervous system. *J Comp Neurol* 454, 241-254.
- 461 Bhattacharjee, A., von Hehn, C.A., Mei, X., and Kaczmarek, L.K. (2005). Localization of the Na<sup>+</sup>-activated  
462 K<sup>+</sup> channel Slick in the rat central nervous system. *J Comp Neurol* 484, 80-92.
- 463 Brown, M.R., Kronengold, J., Gazula, V.R., Chen, Y., Strumbos, J.G., Sigworth, F.J., Navaratnam, D., and  
464 Kaczmarek, L.K. (2010). Fragile X mental retardation protein controls gating of the sodium-activated  
465 potassium channel Slack. *Nat Neurosci* 13, 819-821.
- 466 Brusa, R., Zimmermann, F., Koh, D.S., Feldmeyer, D., Gass, P., Seeburg, P.H., and Sprengel, R. (1995).  
467 Early-onset epilepsy and postnatal lethality associated with an editing-deficient GluR-B allele in mice.  
468 *Science* 270, 1677-1680.
- 469 Budelli, G., Hage, T.A., Wei, A., Rojas, P., Jong, Y.J., O'Malley, K., and Salkoff, L. (2009). Na<sup>+</sup>-activated K<sup>+</sup>  
470 channels express a large delayed outward current in neurons during normal physiology. *Nat Neurosci* 12,  
471 745-750.
- 472 Burman, J.L., Bourbonniere, L., Philie, J., Stroh, T., Dejgaard, S.Y., Presley, J.F., and McPherson, P.S.  
473 (2008). Scyl1, mutated in a recessive form of spinocerebellar neurodegeneration, regulates COPI-  
474 mediated retrograde traffic. *J Biol Chem* 283, 22774-22786.
- 475 Burman, J.L., Hamlin, J.N., and McPherson, P.S. (2010). Scyl1 regulates Golgi morphology. *PLoS One* 5,  
476 e9537.
- 477 Burns, C.M., Chu, H., Rueter, S.M., Hutchinson, L.K., Canton, H., Sanders-Bush, E., and Emeson, R.B.  
478 (1997). Regulation of serotonin-2C receptor G-protein coupling by RNA editing. *Nature* 387, 303-308.
- 479 Cataldi, M., Nobili, L., Zara, F., Combi, R., Prato, G., Giacomini, T., Capra, V., De Marco, P., Ferini-Strambi,  
480 L., and Mancardi, M.M. (2019). Migrating focal seizures in Autosomal Dominant Sleep-related  
481 Hypermotor Epilepsy with KCNT1 mutation. *Seizure* 67, 57-60.
- 482 Chafe, S.C., and Mangroo, D. (2010). Scyl1 facilitates nuclear tRNA export in mammalian cells by acting  
483 at the nuclear pore complex. *Mol Biol Cell* 21, 2483-2499.

- 484 Chen, C.X., Cho, D.S., Wang, Q., Lai, F., Carter, K.C., and Nishikura, K. (2000). A third member of the RNA-  
485 specific adenosine deaminase gene family, ADAR3, contains both single- and double-stranded RNA  
486 binding domains. *RNA* 6, 755-767.
- 487 Deffit, S.N., and Hundley, H.A. (2016). To edit or not to edit: regulation of ADAR editing specificity and  
488 efficiency. *Wiley Interdiscip Rev RNA* 7, 113-127.
- 489 Deffit, S.N., Yee, B.A., Manning, A.C., Rajendren, S., Vadlamani, P., Wheeler, E.C., Domissy, A.,  
490 Washburn, M.C., Yeo, G.W., and Hundley, H.A. (2017). The *C. elegans* neural editome reveals an ADAR  
491 target mRNA required for proper chemotaxis. *Elife* 6.
- 492 Dickinson, D.J., Ward, J.D., Reiner, D.J., and Goldstein, B. (2013). Engineering the *Caenorhabditis elegans*  
493 genome using Cas9-triggered homologous recombination. *Nat Methods* 10, 1028-1034.
- 494 Evely, K.M., Pryce, K.D., and Bhattacharjee, A. (2017). The Phe932Ile mutation in KCNT1 channels  
495 associated with severe epilepsy, delayed myelination and leukoencephalopathy produces a loss-of-  
496 function channel phenotype. *Neuroscience* 351, 65-70.
- 497 Ganem, N.S., Ben-Asher, N., Manning, A.C., Deffit, S.N., Washburn, M.C., Wheeler, E.C., Yeo, G.W.,  
498 Zgayer, O.B., Mantsur, E., Hundley, H.A., *et al.* (2019). Disruption in A-to-I Editing Levels Affects *C.*  
499 *elegans* Development More Than a Complete Lack of Editing. *Cell Rep* 27, 1244-1253 e1244.
- 500 Gonzalez, C., Lopez-Rodriguez, A., Srikumar, D., Rosenthal, J.J., and Holmgren, M. (2011). Editing of  
501 human K(V)1.1 channel mRNAs disrupts binding of the N-terminus tip at the intracellular cavity. *Nat*  
502 *Commun* 2, 436.
- 503 Gott, J.M., and Emeson, R.B. (2000). Functions and mechanisms of RNA editing. *Annu Rev Genet* 34, 499-  
504 531.
- 505 Gururaj, S., Palmer, E.E., Sheehan, G.D., Kandula, T., Macintosh, R., Ying, K., Morris, P., Tao, J., Dias, K.R.,  
506 Zhu, Y., *et al.* (2017). A De Novo Mutation in the Sodium-Activated Potassium Channel KCNT2 Alters Ion  
507 Selectivity and Causes Epileptic Encephalopathy. *Cell Rep* 21, 926-933.
- 508 Hansen, N., Widman, G., Hattingen, E., Elger, C.E., and Kunz, W.S. (2017). Mesial temporal lobe epilepsy  
509 associated with KCNT1 mutation. *Seizure* 45, 181-183.
- 510 Hellwig, S., and Bass, B.L. (2008). A starvation-induced noncoding RNA modulates expression of Dicer-  
511 regulated genes. *Proc Natl Acad Sci U S A* 105, 12897-12902.
- 512 Hu, C.D., Chinenov, Y., and Kerppola, T.K. (2002). Visualization of interactions among bZIP and Rel family  
513 proteins in living cells using bimolecular fluorescence complementation. *Mol Cell* 9, 789-798.
- 514 Huang, H., Tan, B.Z., Shen, Y., Tao, J., Jiang, F., Sung, Y.Y., Ng, C.K., Raida, M., Kohr, G., Higuchi, M., *et al.*  
515 (2012). RNA editing of the IQ domain in Ca(v)1.3 channels modulates their Ca(2)(+)-dependent  
516 inactivation. *Neuron* 73, 304-316.
- 517 Jin, Y., Zhang, W., and Li, Q. (2009). Origins and evolution of ADAR-mediated RNA editing. *IUBMB Life* 61,  
518 572-578.
- 519 Joiner, W.J., Tang, M.D., Wang, L.Y., Dworetzky, S.I., Boissard, C.G., Gan, L., Gribkoff, V.K., and  
520 Kaczmarek, L.K. (1998). Formation of intermediate-conductance calcium-activated potassium channels  
521 by interaction of Slack and Slo subunits. *Nat Neurosci* 1, 462-469.
- 522 Kaczmarek, L.K. (2013). Slack, Slick and Sodium-Activated Potassium Channels. *ISRN Neurosci* 2013.

- 523 Kawasaki, Y., Kuki, I., Ehara, E., Murakami, Y., Okazaki, S., Kawawaki, H., Hara, M., Watanabe, Y.,  
524 Kishimoto, S., Suda, K., *et al.* (2017). Three Cases of KCNT1 Mutations: Malignant Migrating Partial  
525 Seizures in Infancy with Massive Systemic to Pulmonary Collateral Arteries. *J Pediatr* *191*, 270-274.
- 526 Kim, D., Perteua, G., Trapnell, C., Pimentel, H., Kelley, R., and Salzberg, S.L. (2013). TopHat2: accurate  
527 alignment of transcriptomes in the presence of insertions, deletions and gene fusions. *Genome Biol* *14*,  
528 R36.
- 529 Kim, U., Wang, Y., Sanford, T., Zeng, Y., and Nishikura, K. (1994). Molecular cloning of cDNA for double-  
530 stranded RNA adenosine deaminase, a candidate enzyme for nuclear RNA editing. *Proc Natl Acad Sci U S*  
531 *A* *91*, 11457-11461.
- 532 Lenz, D., McClean, P., Kansu, A., Bonnen, P.E., Ranucci, G., Thiel, C., Straub, B.K., Harting, I., Alhaddad, B.,  
533 Dimitrov, B., *et al.* (2018). SCYL1 variants cause a syndrome with low gamma-glutamyl-transferase  
534 cholestasis, acute liver failure, and neurodegeneration (CALFAN). *Genet Med* *20*, 1255-1265.
- 535 Li, J.Q., Gong, J.Y., Knisely, A.S., Zhang, M.H., and Wang, J.S. (2019). Recurrent acute liver failure  
536 associated with novel SCYL1 mutation: A case report. *World J Clin Cases* *7*, 494-499.
- 537 Lim, C.X., Ricos, M.G., Dibbens, L.M., and Heron, S.E. (2016). KCNT1 mutations in seizure disorders: the  
538 phenotypic spectrum and functional effects. *J Med Genet* *53*, 217-225.
- 539 Liu, P., Chen, B., and Wang, Z.W. (2013). Postsynaptic current bursts instruct action potential firing at a  
540 graded synapse. *Nat Commun* *4*, 1911.
- 541 Liu, P., Chen, B., and Wang, Z.W. (2014). SLO-2 potassium channel is an important regulator of  
542 neurotransmitter release in *Caenorhabditis elegans*. *Nat Commun* *5*, 5155.
- 543 Liu, P., Wang, S.J., Wang, Z.W., and Chen, B. (2018). HRPV-2, a Homolog of Mammalian hnRNP U,  
544 Regulates Synaptic Transmission by Controlling the Expression of SLO-2 Potassium Channel in  
545 *Caenorhabditis elegans*. *J Neurosci* *38*, 1073-1084.
- 546 Liu, Q., Chen, B., Ge, Q., and Wang, Z.W. (2007). Presynaptic Ca<sup>2+</sup>/calmodulin-dependent protein kinase  
547 II modulates neurotransmitter release by activating BK channels at *Caenorhabditis elegans*  
548 neuromuscular junction. *J Neurosci* *27*, 10404-10413.
- 549 Lomeli, H., Mosbacher, J., Melcher, T., Hoyer, T., Geiger, J.R., Kuner, T., Monyer, H., Higuchi, M., Bach,  
550 A., and Seeburg, P.H. (1994). Control of kinetic properties of AMPA receptor channels by nuclear RNA  
551 editing. *Science* *266*, 1709-1713.
- 552 Manning, G., Whyte, D.B., Martinez, R., Hunter, T., and Sudarsanam, S. (2002). The protein kinase  
553 complement of the human genome. *Science* *298*, 1912-1934.
- 554 McTague, A., Nair, U., Malhotra, S., Meyer, E., Trump, N., Gazina, E.V., Papandreou, A., Ngoh, A.,  
555 Ackermann, S., Ambegaonkar, G., *et al.* (2018). Clinical and molecular characterization of KCNT1-related  
556 severe early-onset epilepsy. *Neurology* *90*, e55-e66.
- 557 Melcher, T., Maas, S., Herb, A., Sprengel, R., Seeburg, P.H., and Higuchi, M. (1996). A mammalian RNA  
558 editing enzyme. *Nature* *379*, 460-464.
- 559 Nishikura, K. (2016). A-to-I editing of coding and non-coding RNAs by ADARs. *Nat Rev Mol Cell Biol* *17*,  
560 83-96.
- 561 Palladino, M.J., Keegan, L.P., O'Connell, M.A., and Reenan, R.A. (2000). A-to-I pre-mRNA editing in  
562 *Drosophila* is primarily involved in adult nervous system function and integrity. *Cell* *102*, 437-449.

- 563 Pelletier, S. (2016). SCYL pseudokinases in neuronal function and survival. *Neural Regen Res* 11, 42-44.
- 564 Pelletier, S., Gingras, S., Howell, S., Vogel, P., and Ihle, J.N. (2012). An early onset progressive motor  
565 neuron disorder in Scyl1-deficient mice is associated with mislocalization of TDP-43. *J Neurosci* 32,  
566 16560-16573.
- 567 Rajendren, S., Manning, A.C., Al-Awadi, H., Yamada, K., Takagi, Y., and Hundley, H.A. (2018). A protein-  
568 protein interaction underlies the molecular basis for substrate recognition by an adenosine-to-inosine  
569 RNA-editing enzyme. *Nucleic Acids Res* 46, 9647-9659.
- 570 Rizzi, S., Knaus, H.G., and Schwarzer, C. (2016). Differential distribution of the sodium-activated  
571 potassium channels slick and slack in mouse brain. *J Comp Neurol* 524, 2093-2116.
- 572 Rizzo, F., Ambrosino, P., Guacci, A., Chetta, M., Marchese, G., Rocco, T., Soldovieri, M.V., Manocchio, L.,  
573 Mosca, I., Casara, G., *et al.* (2016). Characterization of two de novo KCNT1 mutations in children with  
574 malignant migrating partial seizures in infancy. *Mol Cell Neurosci* 72, 54-63.
- 575 Rula, E.Y., Lagrange, A.H., Jacobs, M.M., Hu, N., Macdonald, R.L., and Emeson, R.B. (2008).  
576 Developmental modulation of GABA(A) receptor function by RNA editing. *J Neurosci* 28, 6196-6201.
- 577 Schmidt, W.M., Kraus, C., Hoger, H., Hochmeister, S., Oberndorfer, F., Branka, M., Bingemann, S.,  
578 Lassmann, H., Muller, M., Macedo-Souza, L.I., *et al.* (2007). Mutation in the Scyl1 gene encoding amino-  
579 terminal kinase-like protein causes a recessive form of spinocerebellar neurodegeneration. *EMBO Rep* 8,  
580 691-697.
- 581 Schmidt, W.M., Rutledge, S.L., Schule, R., Mayerhofer, B., Zuchner, S., Boltshauser, E., and Bittner, R.E.  
582 (2015). Disruptive SCYL1 Mutations Underlie a Syndrome Characterized by Recurrent Episodes of Liver  
583 Failure, Peripheral Neuropathy, Cerebellar Atrophy, and Ataxia. *Am J Hum Genet* 97, 855-861.
- 584 Shohet, A., Cohen, L., Haguel, D., Mozer, Y., Shomron, N., Tzur, S., Bazak, L., Basel Salmon, L., and  
585 Krause, I. (2019). Variant in SCYL1 gene causes aberrant splicing in a family with cerebellar ataxia,  
586 recurrent episodes of liver failure, and growth retardation. *Eur J Hum Genet* 27, 263-268.
- 587 Sommer, B., Kohler, M., Sprengel, R., and Seeburg, P.H. (1991). RNA editing in brain controls a  
588 determinant of ion flow in glutamate-gated channels. *Cell* 67, 11-19.
- 589 Spagnoli, C., Frattini, D., Salerno, G.G., and Fusco, C. (2018). On CALFAN syndrome: report of a patient  
590 with a novel variant in SCYL1 gene and recurrent respiratory failure. *Genet Med*.
- 591 Spagnoli, C., Frattini, D., Salerno, G.G., and Fusco, C. (2019). On CALFAN syndrome: report of a patient  
592 with a novel variant in SCYL1 gene and recurrent respiratory failure. *Genet Med* 21, 1663-1664.
- 593 Streit, A.K., Derst, C., Wegner, S., Heinemann, U., Zahn, R.K., and Decher, N. (2011). RNA editing of Kv1.1  
594 channels may account for reduced ictogenic potential of 4-aminopyridine in chronic epileptic rats.  
595 *Epilepsia* 52, 645-648.
- 596 Tan, M.H., Li, Q., Shanmugam, R., Piskol, R., Kohler, J., Young, A.N., Liu, K.I., Zhang, R., Ramaswami, G.,  
597 Ariyoshi, K., *et al.* (2017). Dynamic landscape and regulation of RNA editing in mammals. *Nature* 550,  
598 249-254.
- 599 Wang, S.J., and Wang, Z.W. (2013). Track-a-worm, an open-source system for quantitative assessment of  
600 *C. elegans* locomotory and bending behavior. *PLoS One* 8, e69653.

601 Washburn, M.C., Kakaradov, B., Sundararaman, B., Wheeler, E., Hoon, S., Yeo, G.W., and Hundley, H.A.  
602 (2014). The dsRBP and inactive editor ADR-1 utilizes dsRNA binding to regulate A-to-I RNA editing across  
603 the *C. elegans* transcriptome. *Cell Rep* 6, 599-607.

604 Yoshimura, S.H., and Hirano, T. (2016). HEAT repeats - versatile arrays of amphiphilic helices working in  
605 crowded environments? *J Cell Sci* 129, 3963-3970.

606 Yuan, A., Dourado, M., Butler, A., Walton, N., Wei, A., and Salkoff, L. (2000). SLO-2, a K<sup>+</sup> channel with an  
607 unusual Cl<sup>-</sup> dependence. *Nat Neurosci* 3, 771-779.

608 Yuan, A., Santi, C.M., Wei, A., Wang, Z.W., Pollak, K., Nonet, M., Kaczmarek, L., Crowder, C.M., and  
609 Salkoff, L. (2003). The sodium-activated potassium channel is encoded by a member of the Slo gene  
610 family. *Neuron* 37, 765-773.

611

## 612 **Figure legends**

### 613 **Figure 1. Loss-of-function mutations of *adr-1* suppress phenotypes caused by a hyperactive SLO-2.**

614 (A) Diagram of ADR-1 domain structures and locations of the non-sense mutations in the *adr-1* mutants.

615 ADR-1 has two double-stranded RNA-binding motifs (dsRBM) and a pseudodeaminase domain. (B)

616 Mutations of *adr-1* mitigated an inhibitory effect of hyperactive or gain-of-function (*gf*) SLO-2 on

617 locomotion through acting in neurons. *adr-1* rescue was achieved by expressing GFP-tagged wild-type

618 ADR-1 in neurons under the control of *Prab-3* (same in C and D). Sample sizes were 10–12 in each group.

619 (C) *adr-1(zw96)* reduced an augmenting effect of *slo-2(gf)* on motor neuron whole-cell outward currents.

620 Pipette solution I and bath solution I were used. Sample sizes were 14 in each group. (D) *adr-1(zw96)*

621 mitigated an inhibitory effect of *slo-2(gf)* on postsynaptic current (PSC) bursts at the neuromuscular

622 junction. The vertical dotted lines over the sample traces mark PSC bursts, which are defined as an apparent

623 increase in PSC frequency accompanied by a sustained current (downward baseline shift) lasting > 3 sec.

624 Pipette solution II and bath solution I were used. Sample sizes were 12 *wild type*, and 7 in each of the

625 remaining groups. All values are shown as mean ± SE. The asterisks indicate statistically significant

626 differences between indicated groups (\**p* < 0.05, \*\*\**p* < 0.001) based on either two-way (C) or one-way

627 (D) ANOVA with Tukey's post hoc tests.

628 The following source data are available for Figure 1:

629 **Source data 1.** Raw data and numerical values for data plotted in Figure 1.



630 **Figure 2. Loss-of-function mutation of *adr-2* suppressed the effects of gain-of-function (*gf*) *slo-2* on**  
631 **locomotion and motor neuron whole-cell currents.** (A) *adr-2(gv42)* alleviated an inhibitory effect of *slo-*  
632 *2(gf)* on locomotion speed. The sample size was 10–12 in each group. (B) *adr-2(gv42)* largely reversed an  
633 augmenting effect of *slo-2(gf)* on whole-cell currents in VA5 motor neuron. Sample sizes were 14 in each  
634 group. All data are shown as mean  $\pm$  SE. Pipette solution I and bath solution I were used. The asterisks  
635 indicate statistically significant differences (\*  $p < 0.05$ ; \*\*\*  $p < 0.001$ ) whereas “ns” stands for “no  
636 significant difference” between the indicated groups based on either one-way (A) or two-way (B) ANOVA  
637 with Tukey's post hoc tests.

638 The following source data are available for Figure 2:

639 **Source data 1.** Raw data and numerical values for data plotted in Figure 2.

640 **Figure 3. ADR-1 is coexpressed with SLO-2 in many neurons and localized in the nucleus.** (A)  
641 Expression of an *adr-1* promoter (*Padr-1*::GFP transcriptional fusion in worms resulted in strong GFP  
642 signal in many neurons (NR, nerve ring; VNC, ventral nerve cord; TG, tail ganglion) and weak GFP signal  
643 in body-wall muscles (BWM) and intestine (Int). (B) GFP-tagged ADR-1 (ADR-1::GFP) colocalized with  
644 a mStrawberry-tagged HIS-58 nucleus marker, as indicated by fluorescence images of VNC motor neurons.  
645 (C) *adr-1* and *slo-2* are co-expressed in many neurons but show differential expressions in the pharynx  
646 (Phx) and Int. Scale bar = 20  $\mu$ m in in all panels.

647 **Figure 4. ADR-1 contributes to motor neuron whole-cell currents and regulates postsynaptic current**  
648 **(PSC) bursts through SLO-2.** (A) Representative VA5 whole-cell current traces. (B) Current (*I*) - voltage  
649 relationships of the whole-cell currents. Sample sizes were 14 in each group. (C) Resting membrane  
650 potentials of VA5. Sample sizes were 6 *wild type*, and 7 in each of the remaining groups. (D) Representative  
651 traces of spontaneous PSCs with PSC bursts marked by vertical dotted lines. (E) Comparisons of PSC burst  
652 properties. Sample sizes were 8 *slo-2(nf101);adr-1(zw96)*, 6 *adr-1(zw96)* rescue, and 12 in each of the  
653 remaining groups. All values are shown as mean  $\pm$  SE. The asterisks indicate statistically significant

654 differences ( $*p < 0.05$ ,  $***p < 0.001$ ) compared with *wild type* whereas “ns” stands for no significant  
655 difference between the indicated groups based on either two-way (**B**) or one-way (**C** and **E**) ANOVA with  
656 Tukey's post hoc tests. Pipette solution I and bath solution I were used in (**A**) and (**C**). Pipette solution II  
657 and bath solution I were used in (**D**).

658 The following figure supplement and source data are available for Figure 4:

659 **Figure supplement 1.** Comparison of *slo-2* transcript level between *wild type* and *adr-1* mutant. Shown  
660 are mean  $\pm$  SE of three RNA-seq experiments.

661 **Source data 1.** Raw data and numerical values for data plotted in Figure 4.

662 **Figure 5. Normalized transcript expression levels of selected genes in *adr-1(zw96)* mutant.** The genes  
663 were selected based on the detection of ADR-1-dependent RNA editing events in their transcripts  
664 reported in an earlier study (Washburn et al., 2014). Transcript expression level of each gene in the  
665 mutant is normalized by that in the wild type. Shown are mean  $\pm$  SE from three biological replicates of  
666 RNA-seq experiments.

667 The following figure supplement and source data are available for Figure 5:

668 **Figure supplement 1.** Alignment of amino acid sequences between *C. elegans* SCYL-1 (*W07G4.3*,  
669 [www.wormbase.org](http://www.wormbase.org)) and human SCYL1 (hSCYL1, GenBank: NP\_065731.3). Identical residues are  
670 highlighted in black, while similar ones (in size or polarity) in blue. The three residues that are essential for  
671 kinase activity in eukaryotic protein kinases are shown in red above the alignment at corresponding  
672 locations. Both proteins contain five HEAT repeats (marked by horizontal green lines) in the central portion.  
673 The *scyl-1* mutant allele *zw99* was made by introducing a stop codon after the residue I<sup>152</sup> (indicated by an  
674 arrow) using the CRISPR/Cas9 approach.

675 **Source data 1.** Raw data and numerical values for data plotted in Figure 5.

676 **Figure 6. *scyl-1* and *slo-2* are coexpressed in ventral cord motor neurons but differentially expressed**  
677 **in other cells.** In transgenic worms coexpressing *Pscyl-1::GFP* and *Pslo-2::mStrawberry* transcriptional

678 fusions, GFP signal was observed in ventral nerve cord (VNC) motor neurons, the large H-shaped excretory  
679 (EXC) cell, vulval muscles (VM), and spermatheca (Spe) while mStrawberry signal was detected in VNC  
680 motor neurons, body-wall muscles (BMW), and many other neurons. Scale bar = 20  $\mu$ m.

681 **Figure 7. SCYL-1 contributes to motor neuron outward currents through SLO-2.** (A) Sample whole-  
682 cell current traces of VA5 motor neurons and the current-voltage relationships. Sample sizes were 14 in  
683 each group. The rescue strain was created by expressing wild-type *scyl-1* under the control of *Prab-3*. All  
684 values are shown as mean  $\pm$  SE. The asterisks (\*\*\*) and pound signs (###) indicate statistically significant  
685 differences ( $p < 0.001$ ) between the indicated groups and from wild type, respectively, whereas “ns” stands  
686 for no significant difference between the indicated groups (two-way ANOVA with Tukey's post hoc tests).  
687 (B) GFP signal in ventral cord motor neurons was indistinguishable between *wild type* and *scyl-1(zw99)*  
688 worms expressing GFP-tagged full-length SLO-2 under the control of *Prab-3*. Scale bar = 20  $\mu$ m.

689 The following source data are available for Figure 7:

690 **Source data 1.** Raw data and numerical values for data plotted in Figure 7.

691 **Figure 8. Single-channel open probability ( $P_o$ ) of SLO-2 is decreased in *scyl-1* mutant.** (A)  
692 Representative SLO-2 single-channel currents from inside-out patches of the VA5 motor neuron, and  
693 comparisons of  $P_o$  and single-channel amplitude between *wild type* ( $n = 14$ ), *scyl-1(zw99)* ( $n = 15$ ), and  
694 *scyl-1(zw99)* rescued by expressing wild-type *scyl-1* in neurons under the control of *Prab-3* ( $n = 11$ ). (B  
695 and C) Fitting of open (B) and closed (C) durations to exponentials, and comparisons of  $\tau$  values and  
696 relative areas of the fitted components (indicated by dotted lines). Pipette solution III and bath solution II  
697 were used. All values are shown as mean  $\pm$  SE. The asterisks indicate a significant difference between the  
698 indicated groups (\*  $p < 0.05$ , \*\*\*  $p < 0.001$ , one-way ANOVA with Tukey's post hoc tests).

699 The following source data are available for Figure 8:

700 **Source data 1.** Raw data and numerical values for data plotted in Figure 8.

701 **Figure 9. SCYL-1 physically interacts with SLO-2 in neurons.** (A) Diagrams of the various fusion  
702 proteins used in the BiFC assays (*left*) and of SLO-2 membrane topology (*right*). The arrow indicates the  
703 split site for SLO-2N and SLO-2C fusions. RCK, regulator of conductance for K<sup>+</sup>. (B) YFP signal was  
704 detected when SCYL-1 was coexpressed with either full-length or the carboxyl terminal portion of SLO-2  
705 but not with the amino terminal portion of SLO-2. Shown are representative fluorescent images of the  
706 ventral nerve cord (indicated by arrows) with corresponding DIC images. The bright signals at the top of  
707 each fluorescence image was from auto-fluorescence of the intestine. Scale bar = 20  $\mu$ m.

708 **Figure 10. ADR-1 regulates *scyl-1* expression through RNA editing at a specific nucleotide in the 3'-**  
709 **UTR.** (A) RNA editing at one out of eight highly (>15%) edited sites is severely deficient in *adr-1(zw96)*  
710 compared *wild type*. The percentage of editing was calculated by dividing the number of reads containing A-  
711 I conversion by the total number of reads at each site. The *x*-axis indicates the positions of the edited  
712 adenosines in chromosome V (NC\_003283). Shown are results (mean  $\pm$  SE) of three RNA-seq experiments.  
713 The asterisks (\*\*\*) indicate a statistically significant difference ( $p < 0.001$ , unpaired *t*-test). (B) Diagram  
714 showing a predicted hair-pin structure in the 3' end of *scyl-1* pre-mRNA with 746 complementary base pairs.  
715 Nucleotide are numbered from the first nucleotide of the 3'-UTR. (C) Chromatograms of *scyl-1* mRNA 3'-  
716 UTRs of *wild type*, *adr-1(zw96)*, and *adr-2(gv42)*, and of the corresponding *wild type* genomic DNA. Two  
717 editing sites in *wild type* mRNA (indicated by arrows) display a mixture of green (adenosine) and black  
718 (guanosine) peaks. While both editing events are non-existent in *adr-2(gv42)*, only one of them is inhibited  
719 by *adr-1(zw96)*. (D) Diagram of two GFP reporter constructs (*wp1923* and *wp1924*) used to confirm the  
720 role of the ADR-1-dependent editing site in gene expression. GFP was placed under the control of *Prab-3*  
721 and fused to the last exon (blue) of *scyl-1* followed by 5 kb downstream genomic sequence. The red bars  
722 indicate the inverted repeat sequences that form the double-stranded RNA in the hair-pin structure (B).  
723 *wp1923* contains the intact genomic sequence of *scyl-1* 3'-UTR, whereas *wp1924* differs from it in an A-  
724 to-G conversion mimicking the ADR-1-dependent editing. (E) Effects of the A-to-G conversion on GFP  
725 reporter expression. Shown are fluorescent and corresponding DIC images of transgenic worms harboring

726 either *wp1923* or *wp1924*. GFP expression in the ventral nerve cord (VNC) was observed only in worms  
727 harboring *wp1924*. The diffused signal at the bottom of each fluorescent image was from auto-fluorescence  
728 of the intestine (Int). Scale bar = 20  $\mu\text{m}$ .

729 The following source data are available for Figure 10:

730 **Source data 1.** Raw data and numerical values for data plotted in Figure 10.

731 **Figure 11. Single-channel open probability ( $P_o$ ) of human Slo2.2/Slack is augmented by SCYL1 in**  
732 ***Xenopus* oocyte expression system.** (A) Representative traces of single-channel currents from inside-out  
733 patches and comparisons of  $P_o$  and single-channel amplitude between patches with and without mouse  
734 SCYL1. (B and C) Fitting of open (B) and closed (C) durations to exponentials, and comparisons of  $\tau$   
735 values and relative areas of the fitted components (indicated by dotted lines) between the two groups.  
736 Sample sizes were 13 in both groups. All values are shown as mean  $\pm$  SE. The asterisks (\*\*\*) indicate a  
737 significant difference compared between the indicated groups ( $p < 0.001$ , unpaired  $t$ -test).

738 The following source data are available for Figure 11:

739 **Source data 1.** Raw data and numerical values for data plotted in Figure 11.

740 **Figure 1**

741

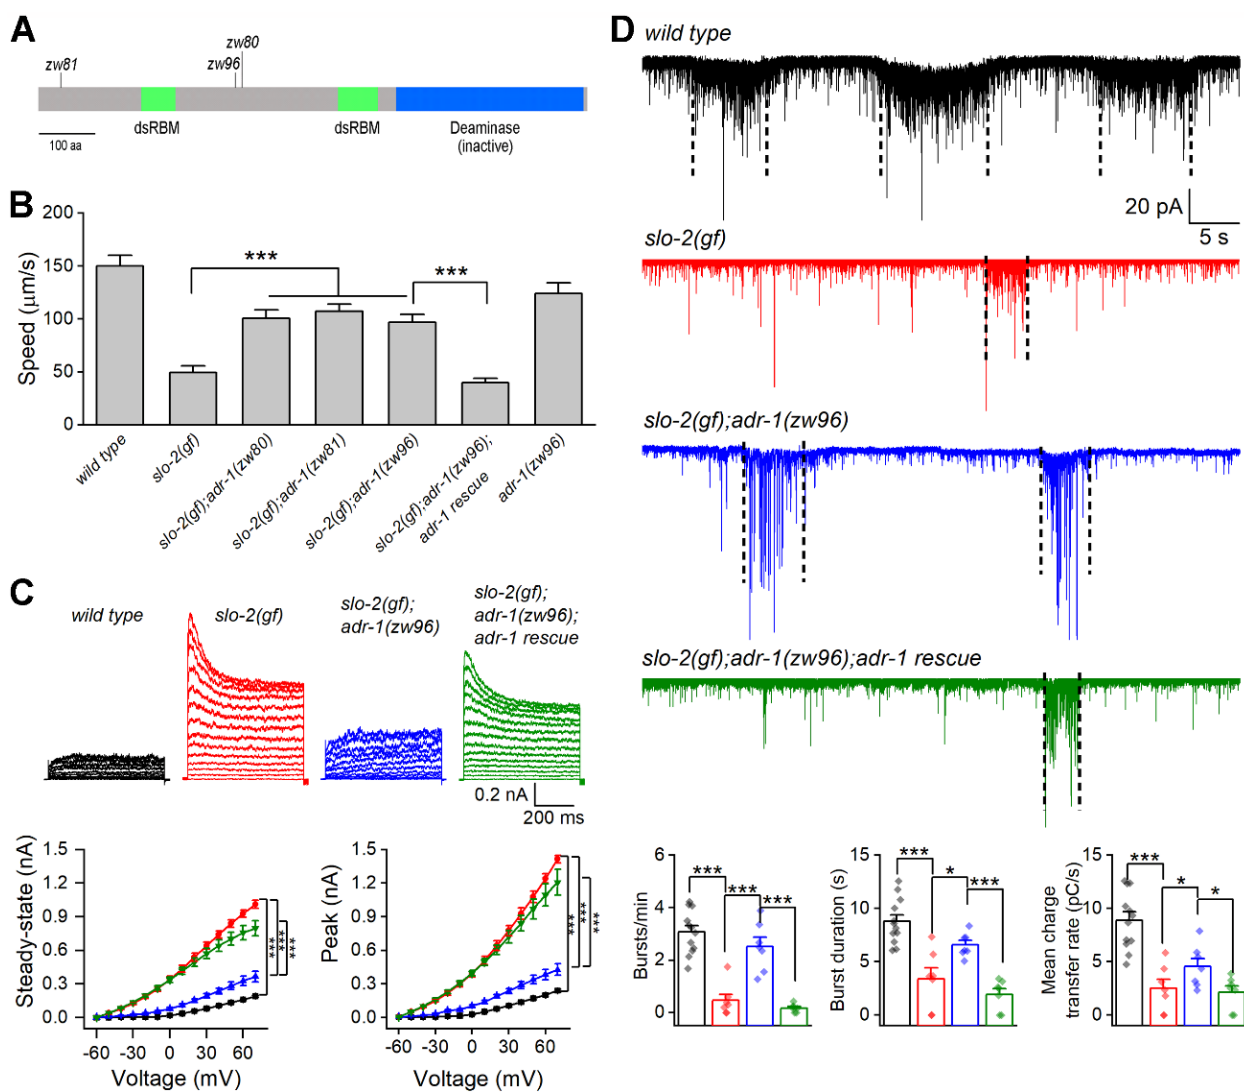

742

743 **Figure 2**

744

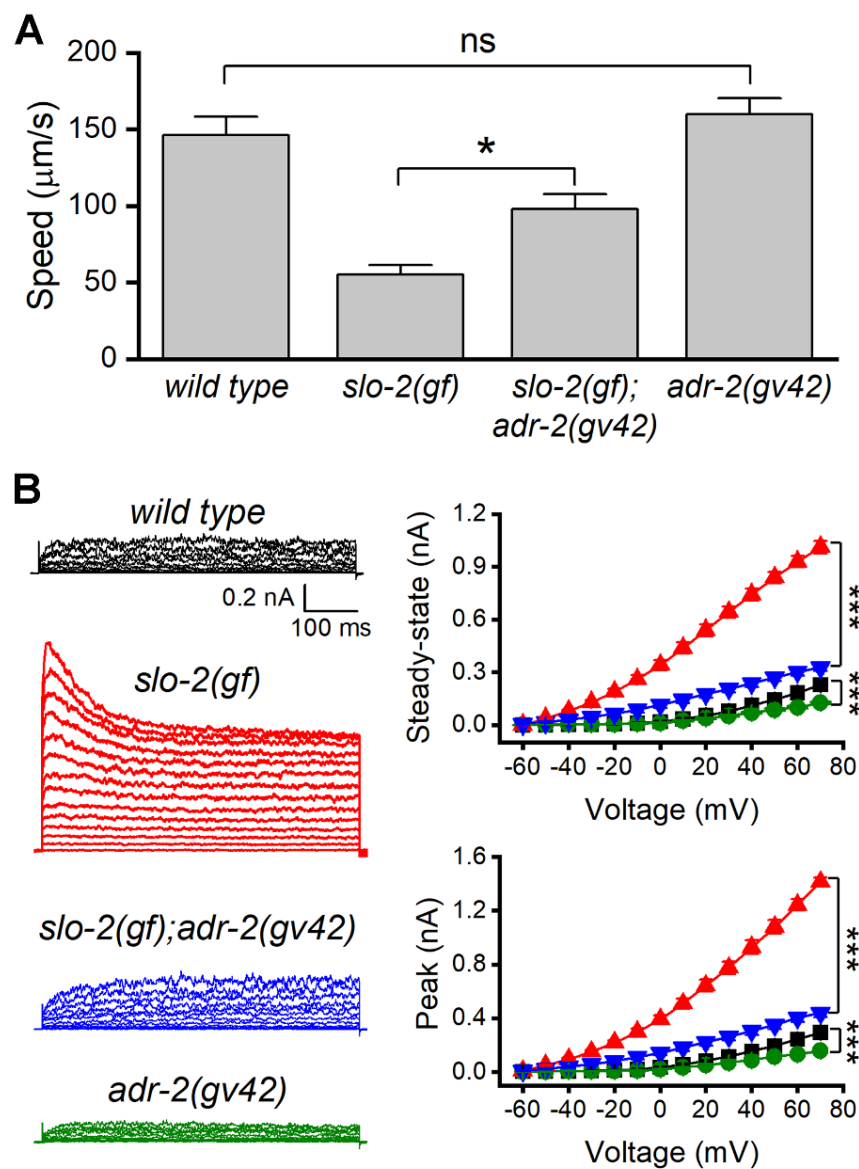

745

746 **Figure 3**

747

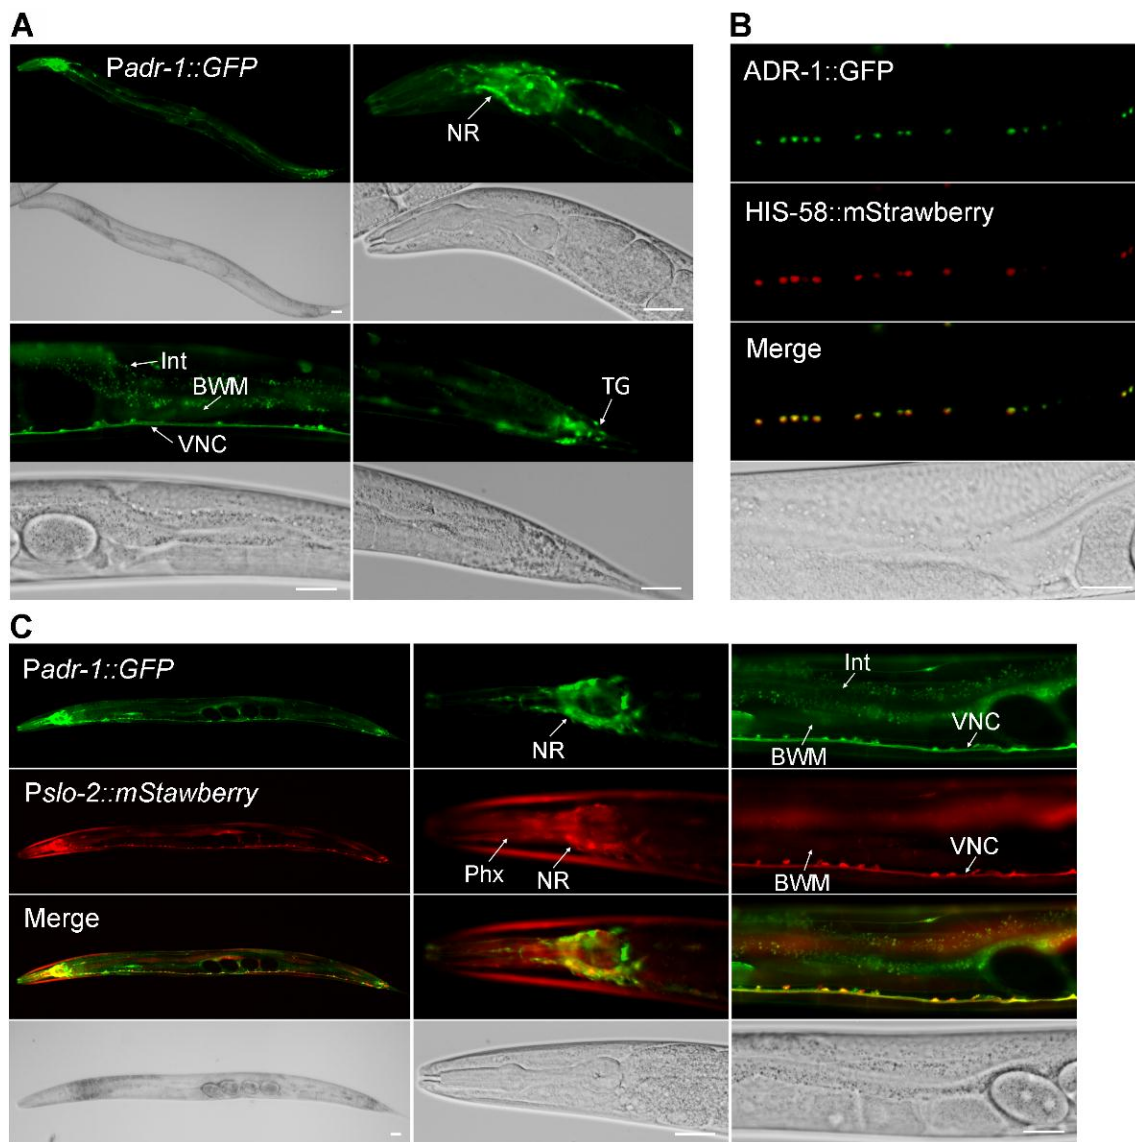

748



749 **Figure 4**

750

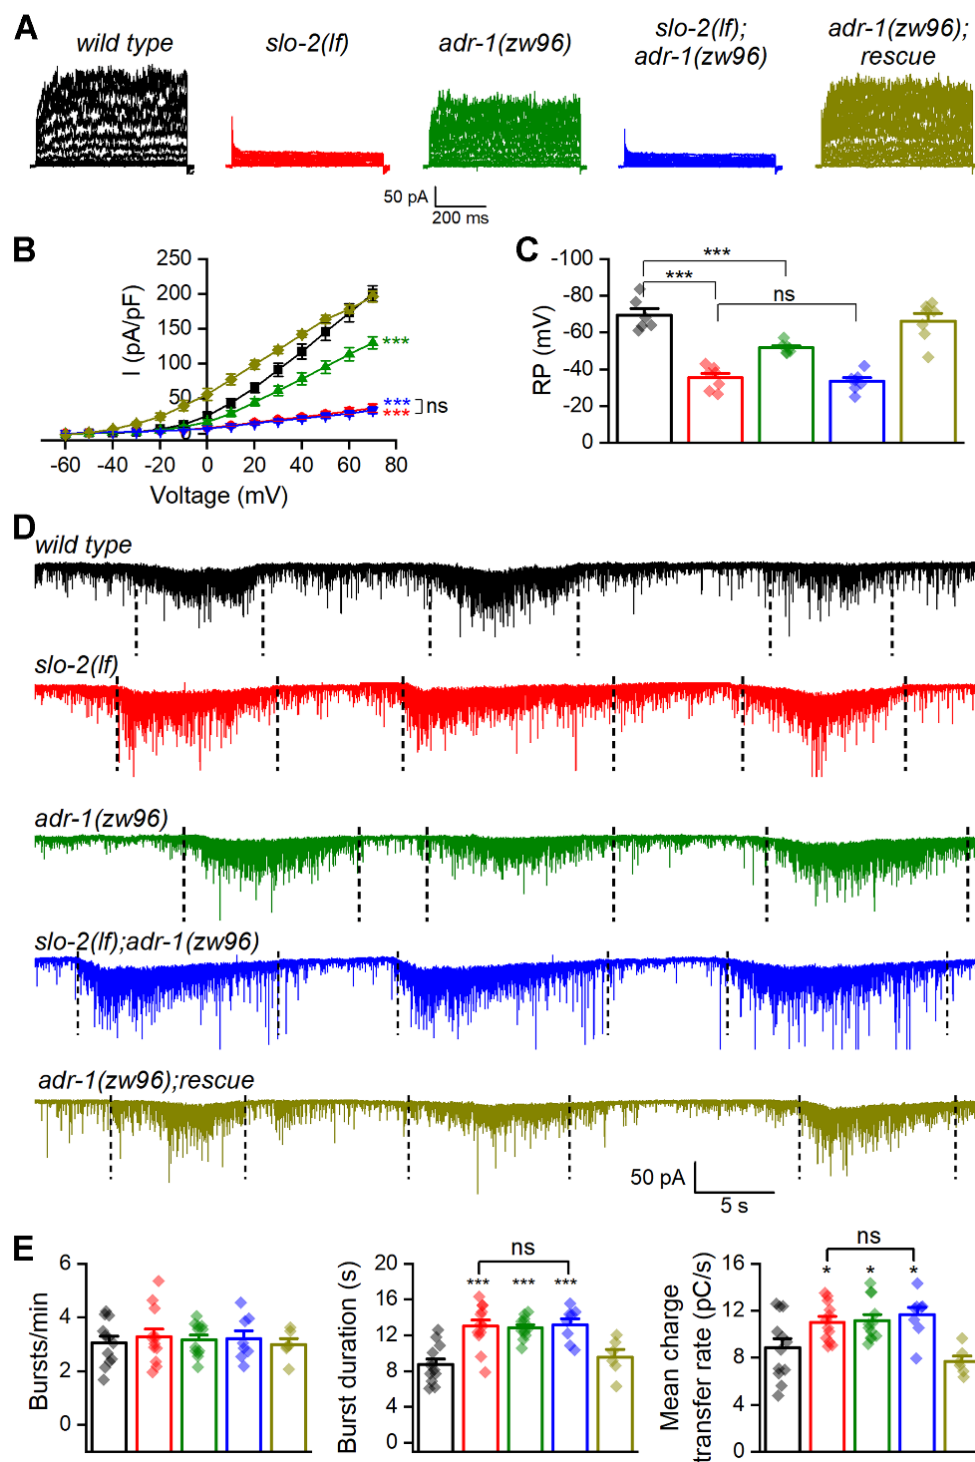

751

752

753 **Figure 4 - Figure supplement 1**

754

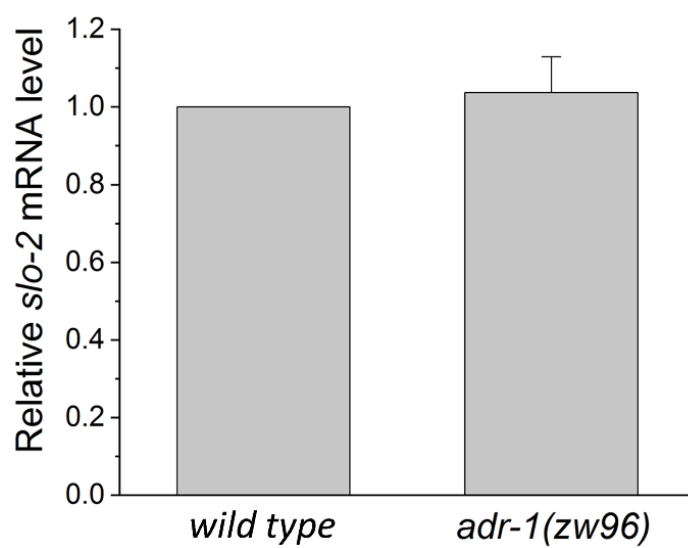

755

756 **Figure 5**

757

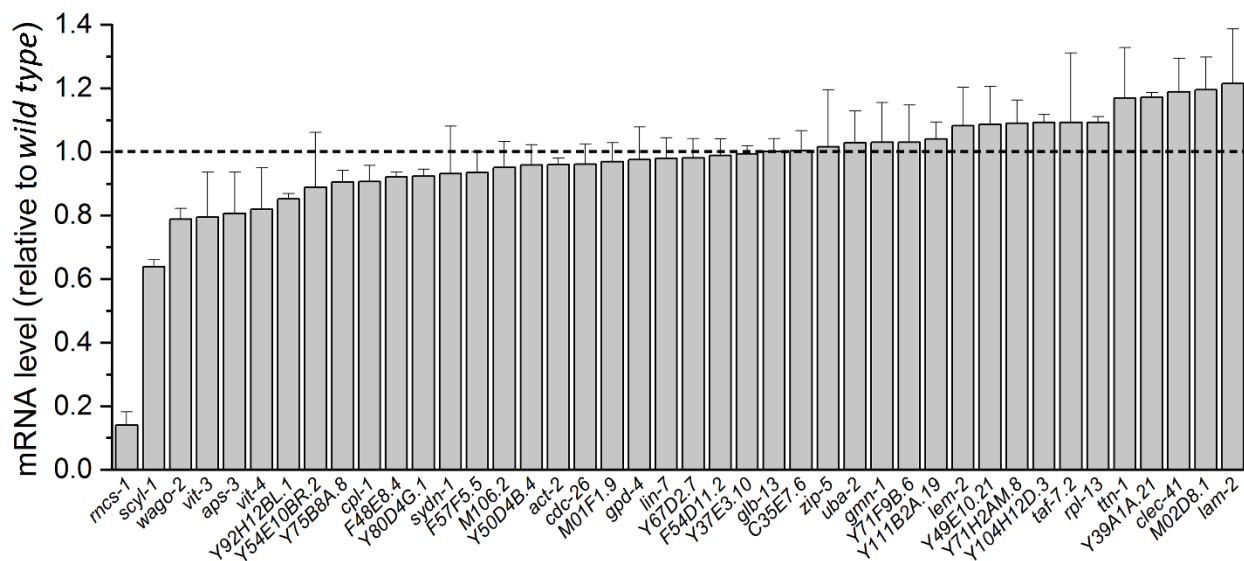

759 **Figure 5 – Figure supplement 1**

760

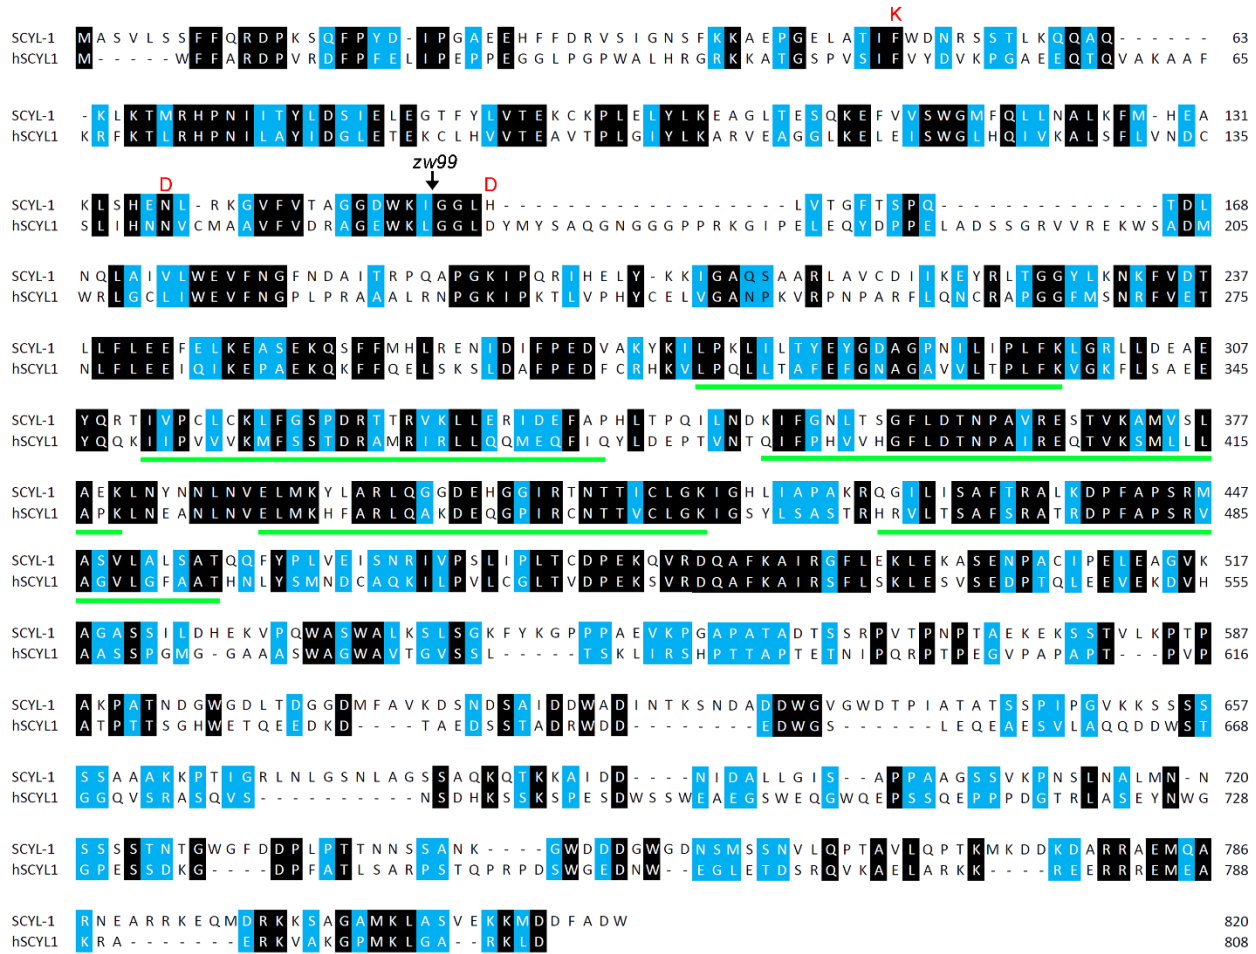

761

762 **Figure 6**

763

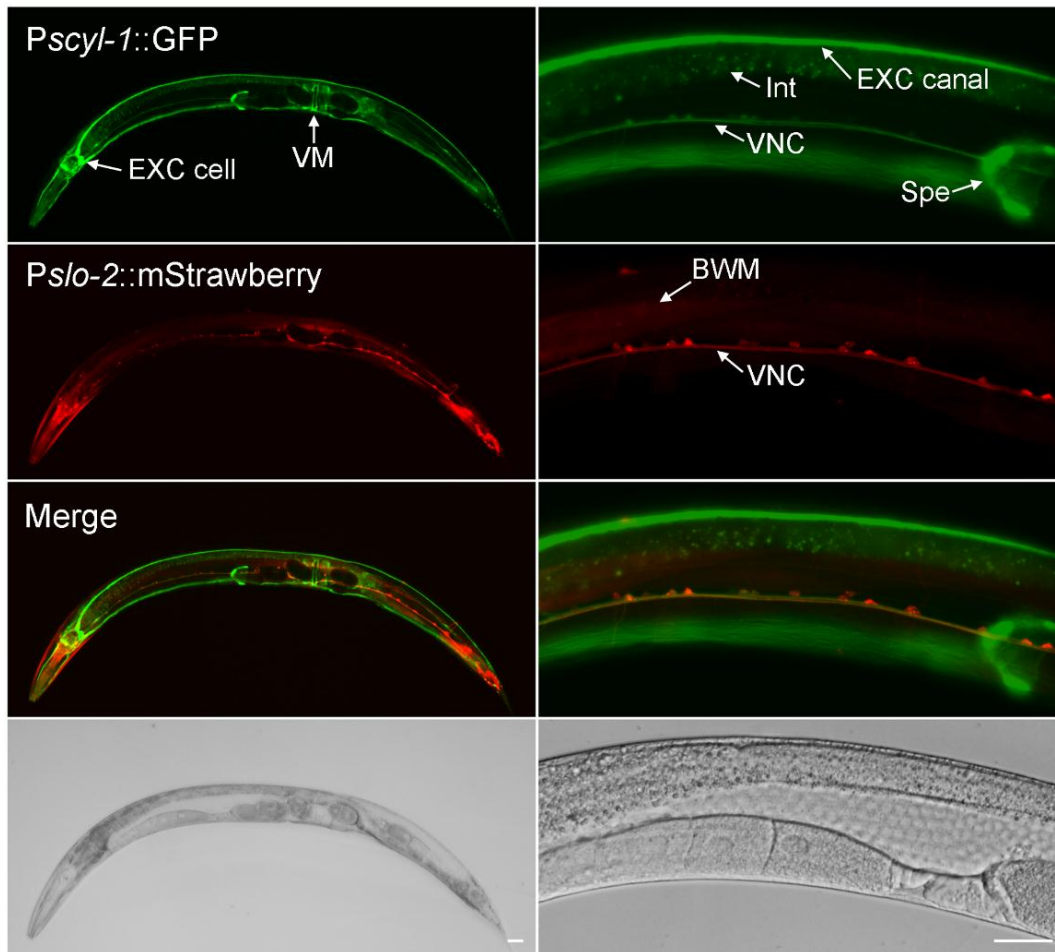

764

765 **Figure 7**

766

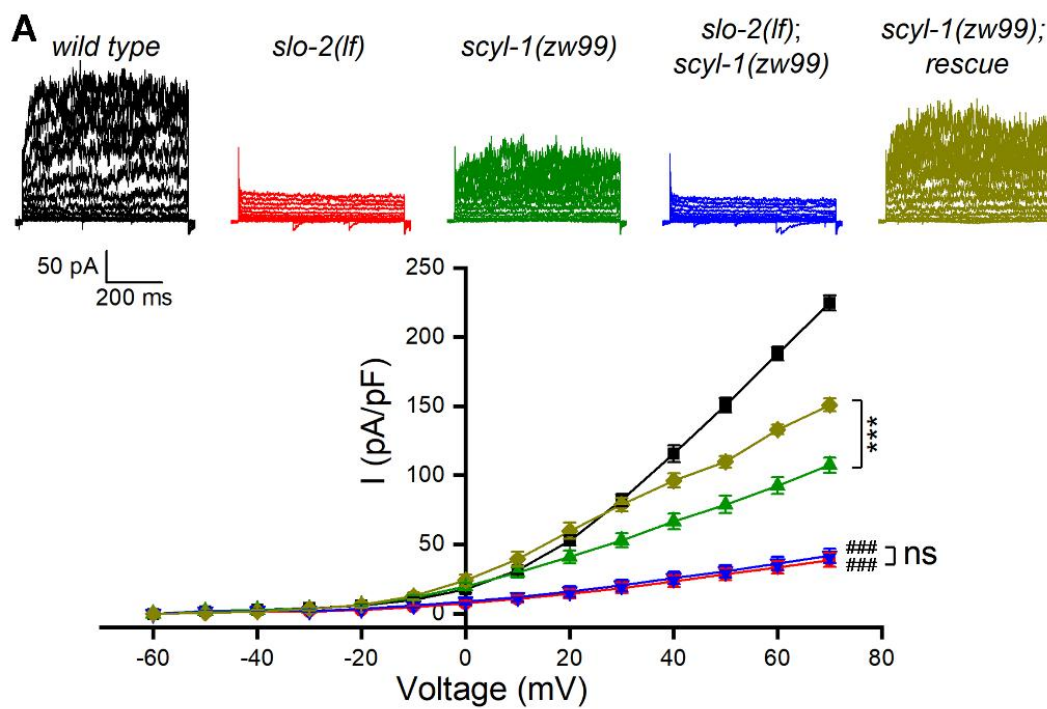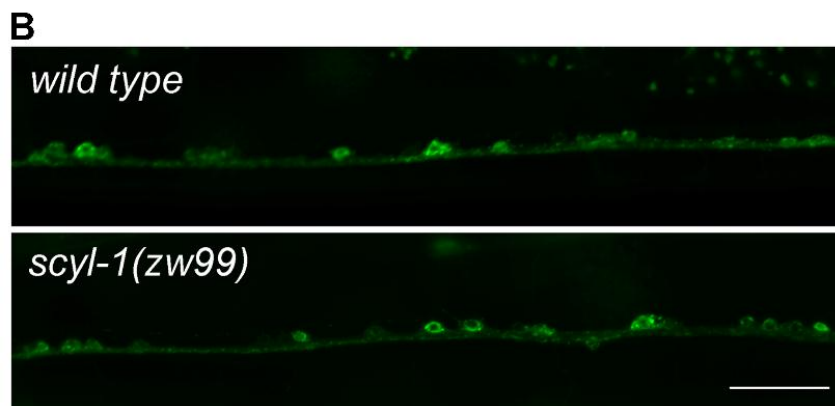

767

768 **Figure 8**

769

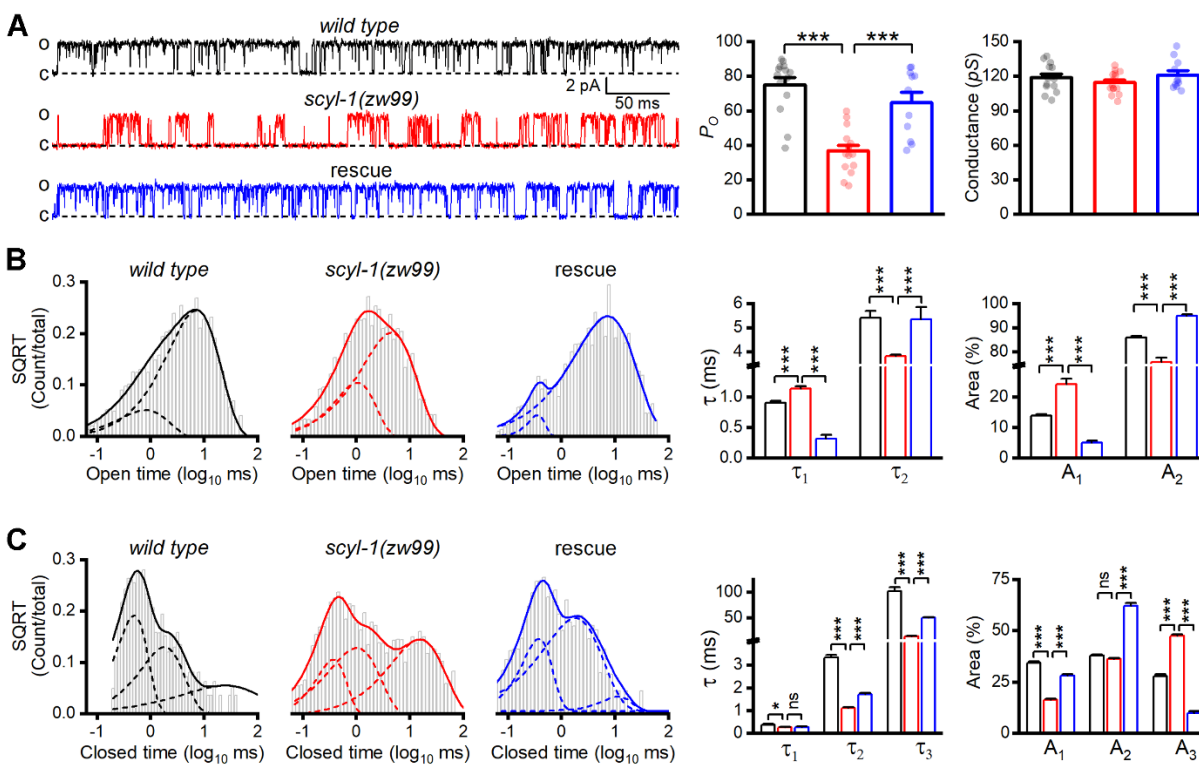

770

771 **Figure 9**

772

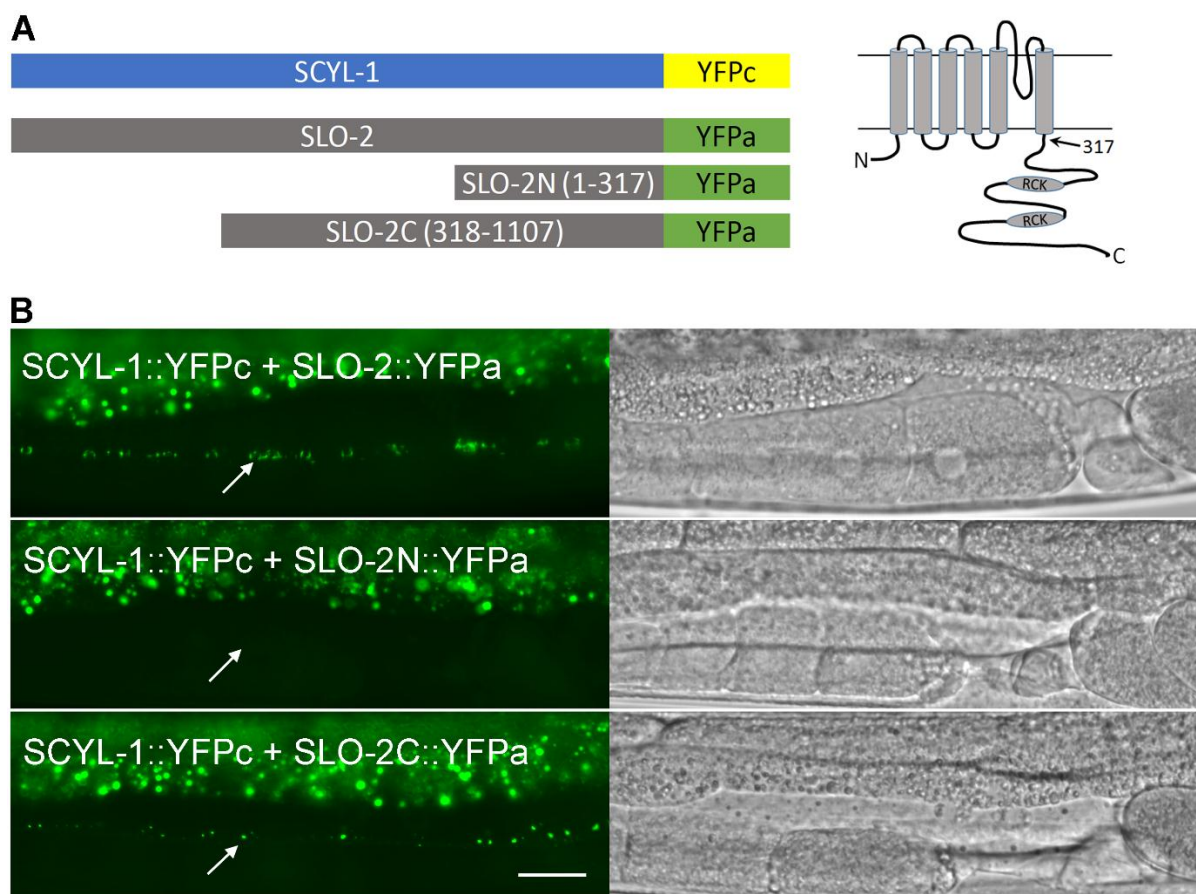



774 **Figure 10**

775

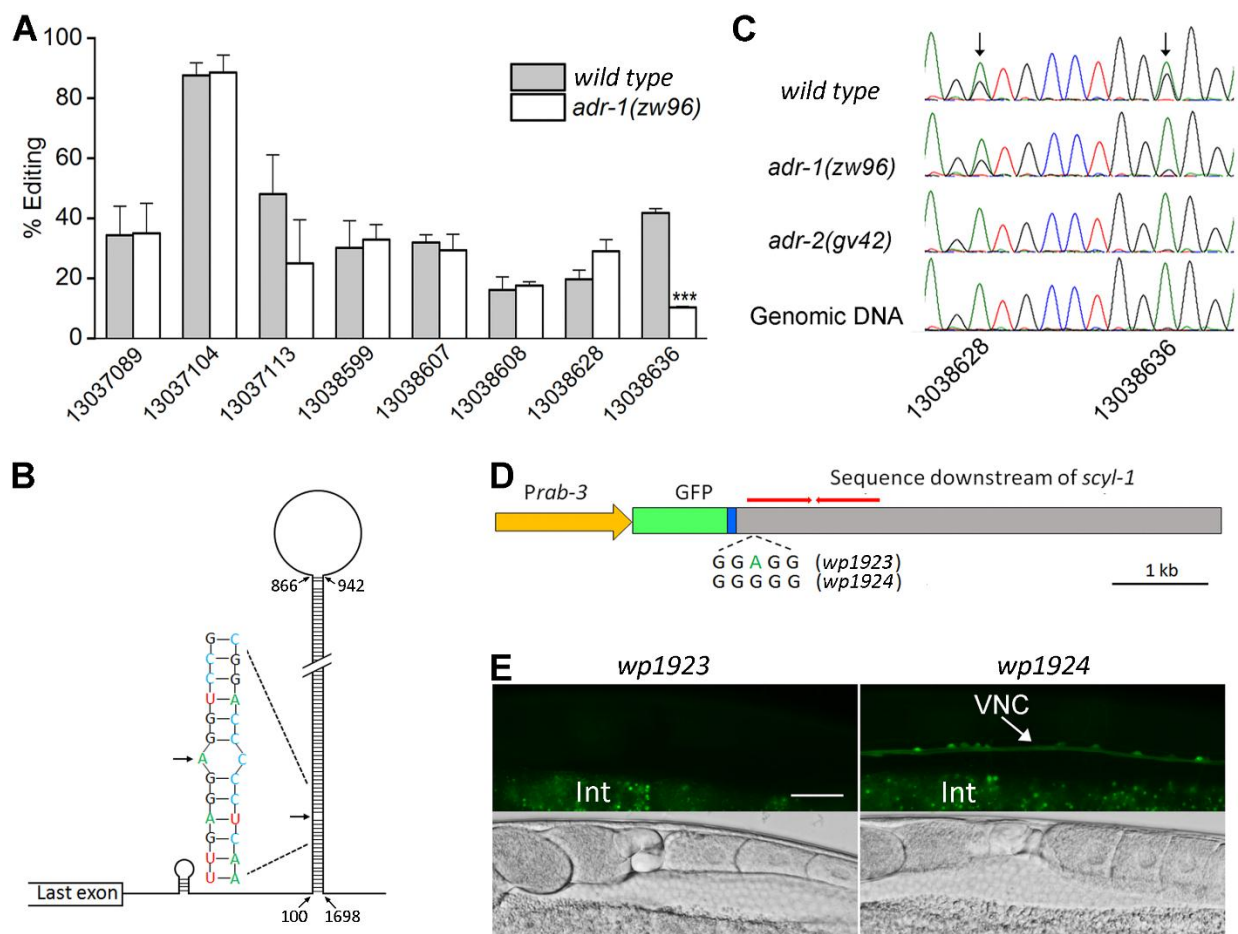

776

777 **Figure 11**

778

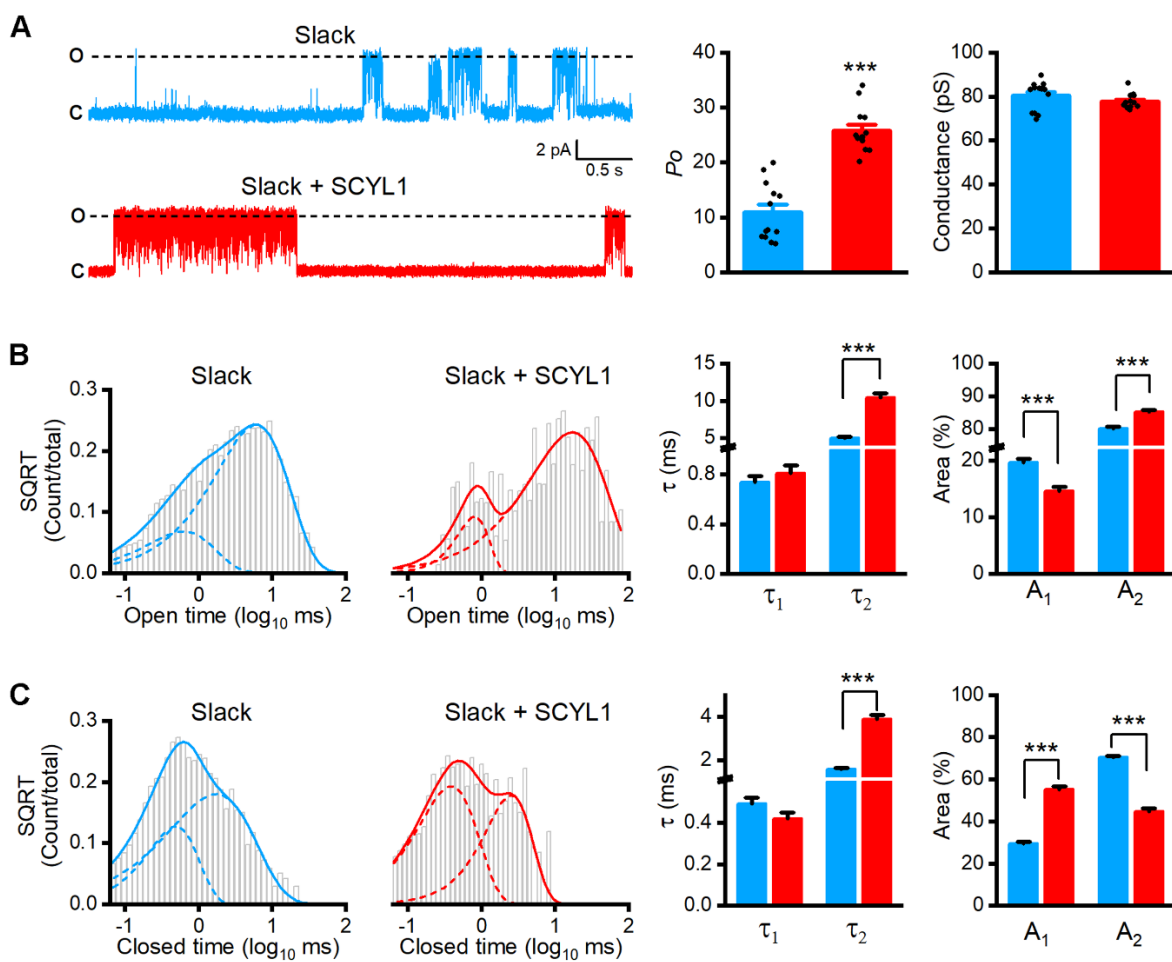

779
